## Shared neural resources of rhythm and syntax: An ALE Meta-Analysis

Matthew Heard<sup>a, b</sup> and Yune S. Lee<sup>a, b, c, †</sup>

<sup>a</sup> Department of Speech and Hearing Sciences, The Ohio State University

<sup>b</sup> Neuroscience Graduate Program, The Ohio State University

<sup>c</sup> Chronic Brain Injury, Discovery Theme, The Ohio State University, Columbus, OH 43210, USA

<sup>†</sup> Corresponding author. *Email address* [lee.7966@osu.edu](mailto:lee.7966@osu.edu)

### Abstract

A growing body of evidence has highlighted behavioral connections between musical rhythm and linguistic syntax, suggesting that these may be mediated by common neural resources. Here, we performed a quantitative meta-analysis of neuroimaging studies using activation likelihood estimate (ALE) to localize the shared neural structures engaged in a representative set of musical rhythm (rhythm, beat, and meter) and linguistic syntax (merge movement, and reanalysis). Rhythm engaged a bilateral sensorimotor network throughout the brain consisting of the inferior frontal gyri, supplementary motor area, superior temporal gyri/temporoparietal junction, insula, the intraparietal lobule, and putamen. By contrast, syntax mostly recruited the left sensorimotor network including the inferior frontal gyrus, posterior superior temporal gyrus, premotor cortex, and supplementary motor area. Intersections between rhythm and syntax maps yielded overlapping regions in the left inferior frontal gyrus, left supplementary motor area, and bilateral insula—neural substrates involved in temporal hierarchy processing and predictive coding. Together, this is the first neuroimaging meta-analysis providing detailed anatomical overlap of sensorimotor regions recruited for musical rhythm and linguistic syntax.

*Keywords: rhythm; beat; meter; temporal processing; merge; movement; reanalysis; syntax; activation likelihood estimate; meta-analysis; fMRI*

### 1. Introduction

Both music and language tasks require efficient analysis of sequential structures in a given sequence. In the music domain, this operation is especially important for understanding the rhythm of a song. Rhythm refers to the temporal pattern of accented and unaccented auditory events present in music (Vuust and Witek, 2014). From the rhythm, listeners are able to extract the beat, the isochronous psychological event that drives the music forward (Grahn, 2012; Nguyen et al., 2018). Beat, also called pulse, in turn gives rise to meter-perceptual patterns of “strong” and “weak” beats—that can be

internally or externally driven (**Figure 1A**; Iversen et al., 2009; Nozaradan et al., 2011). We consider these two derivatives as “rhythm” in the current meta-analysis. In the language domain, similar neural mechanisms may be at play in binding and moving around syntactic phrases in a given sentence (Kotz et al., 2009; Rothermich et al., 2012; Schmidt-Kassow and Kotz, 2008a). Notably, it has been suggested that natural grammar learning is based upon temporal context of spoken sentences. For instance, infants can use prosodic cues to identify syntactic boundaries (Fernald and McRoberts, 1996), and children adhere to strong metrical sequences while listening to sentences (Moritz et al., 2013; Strait et al., 2011). It has also been shown that metric patterns of speech facilitate comprehension of syntactically challenging sentences (Roncaglia-Denissen et al., 2013). Conversely, failure to detect timing cues may give rise to speech and language disorders such as dyslexia and specific language impairment (SLI; Goswami, 2011). Indeed, there are ample reports regarding deficits in rhythm and grammar in dyslexia and SLI, suggesting dysfunctional temporal processing is responsible for these developmental language disorders (Corriveau and Goswami, 2009; Gordon et al., 2015b; Goswami et al., 2013; Huss et al., 2011; Thomson and Goswami, 2008). Accordingly, rhythm training has been utilized as speech and language intervention programs for these populations (Bedoin et al., 2016; Bhide et al., 2013; Flaughnacco et al., 2015; Gordon et al., 2015b; Ozernov-Palchik et al., 2018; Przybylski et al., 2013).

Within linguistic syntax, there are several sub-operations including merge, movement, reanalysis, syntactic surprisal (also known as prediction), morphosyntactic task, and others. In the present article, our scope is limited to merge, movement, and reanalysis (**Figure 1B**) as these were the only domains with enough experiments that passed our criteria of inclusion (see Methods 2.2 for more details). Merge involves combining words and phrases into larger syntactic building units (e.g. for + him = {for him}) (Chomsky, 1995; Zaccarella et al., 2017). Movement involves shifting phrases to fill dependent nodes such as traces in *wh*- questions (e.g. “What concert did you go to?”) (Grodzinsky and Santi, 2008; Santi and Grodzinsky, 2007a, 2007b). Reanalysis is the process of listeners revising previously constructed phrases, such as in garden path (e.g. “the horse raced passed the barn fell”) and object-relative (e.g. “boys that girls help are nice”) sentences (Caplan and Waters, 1999; Sturt and Crocker, 1996).

While both rhythm and syntax networks have been extensively studied by neuroimaging, the degree to which these networks overlap with or are segregated from each other remains to be determined. This may be a timely and important question given that there has been emerging evidence of behavioral connections between music and language (Gordon et al., 2015a). To this end, we performed a series of neuroimaging meta-analyses using activation likelihood estimate (ALE) (Chein et al.,

2002; Eickhoff et al., 2012, 2009; Turkeltaub et al., 2012) on a set of experiments examining musical rhythm (rhythm, beat, meter) and linguistic syntax (merge, movement, reanalysis). By considering various types of rhythm and syntax, we avoided limiting the scope of our ALE findings to particular processes. ALE was developed independently by two groups (Chein et al., 2002; Turkeltaub et al., 2002) and has been widely used in the neuroimaging community to identify brain regions that are consistently implicated across numerous studies for particular sensory/cognitive processes. We first attempted to identify the core resources of rhythm and syntax independently by performing ALE analyses within each domain. To ensure that the activation maps computed equally represented each sub-process of rhythm (rhythm, meter, beat) and syntax (merge, movement, reanalysis), the number of experiments included from each sub-process was matched. Then, we identified overlapping regions between these core rhythm and syntax regions. Together, the present article affords a comprehensive picture of the common neural structures engaged in rhythm and syntax processing.

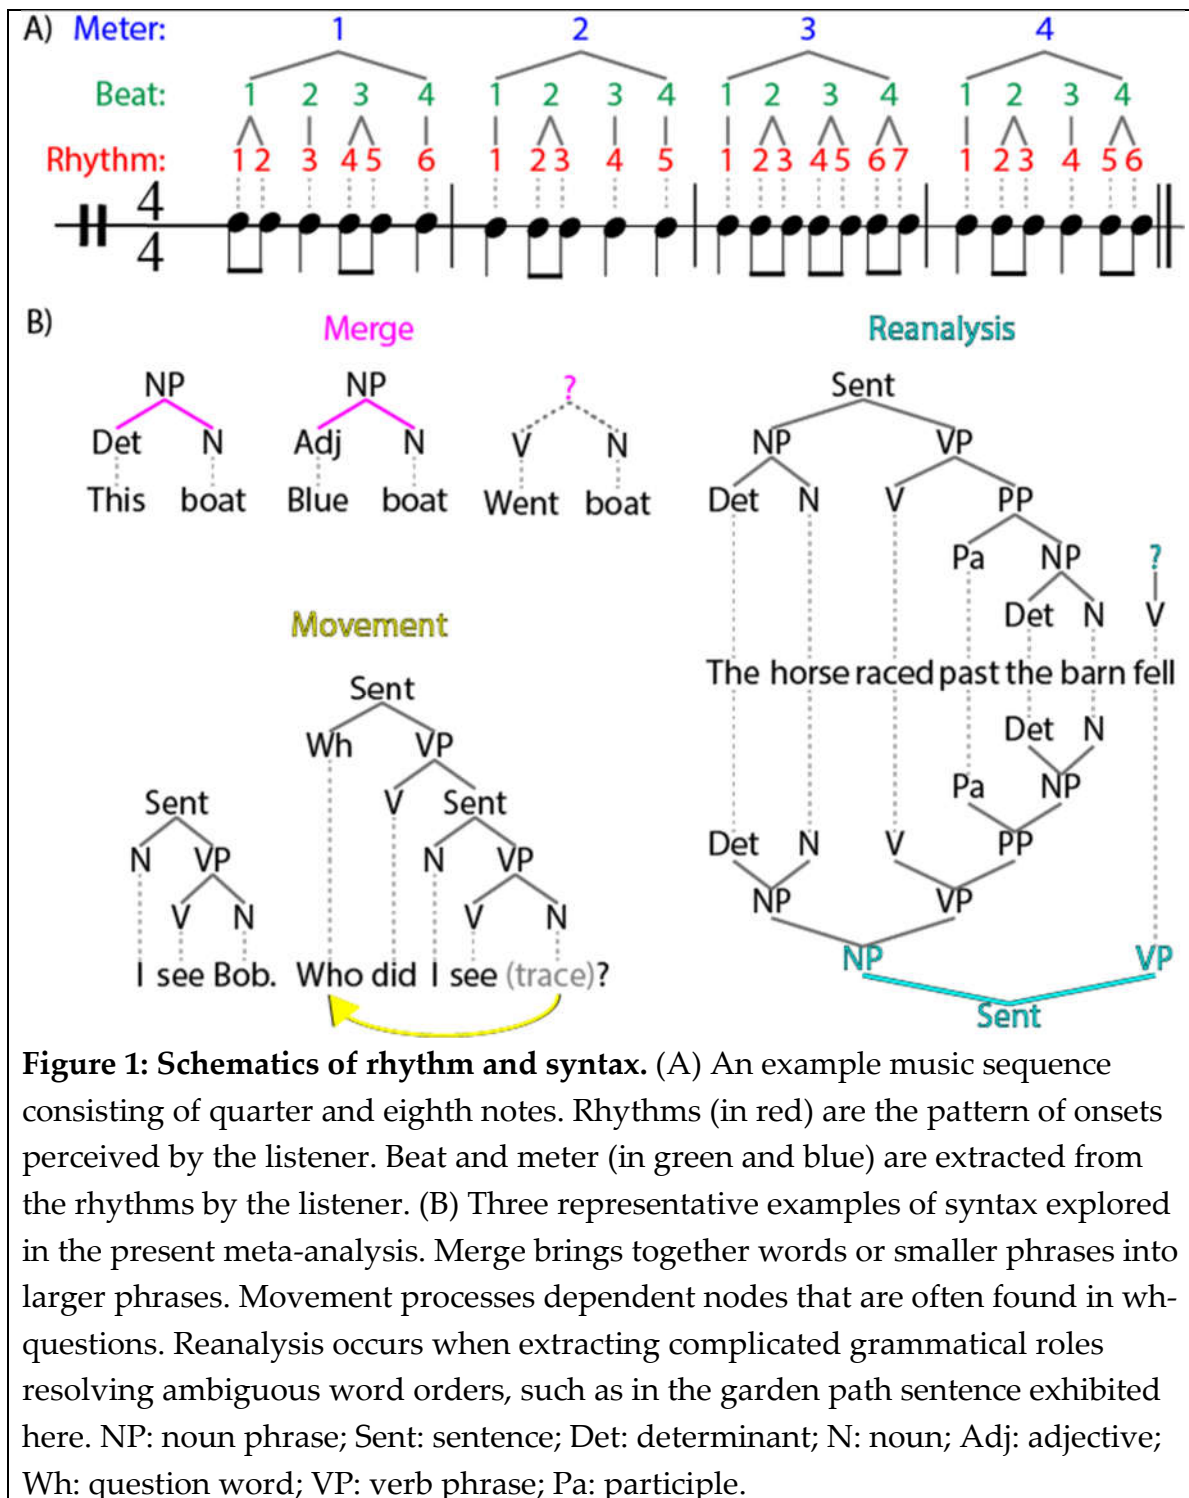

## 2. Methods

### 2.1 ALE Meta-analysis

In ALE, foci of activation are modeled as three-dimensional Gaussian distributions of probability in order to capture some of the geographical uncertainty that is inherent to fMRI and PET experiments:

$$P = \frac{e \times \left(\frac{-d^2}{2\sigma^2}\right)}{(2\pi)^{3/2} \times \sigma^3}$$

This equation transforms each focus into a three-dimensional Gaussian distribution. Every voxel in the brain is assigned a probability  $P$  based on  $d$ , the Euclidean distance between each voxel and the nearest coordinate drawn from each experiment, and  $\sigma$ , the degree of noise, which depends on the number of subjects from the experiment (Eickhoff et al., 2009; Wiener et al., 2010). By repeating this procedure across all reported foci from each experiment, modeled activation (MA) scores are computed (Turkeltaub et al., 2012). Then, the ALE score of each voxel is determined by summing all of the MA scores from all experiments. Finally, the resulting map is tested against the null distribution in which all foci are randomly and independently scattered through the gray matter of the brain (Eickhoff et al., 2012; Turkeltaub et al., 2012).

### 2.2 Literature Search

In order to find experiments to include in this meta-analysis, a literature search was performed on October 29<sup>th</sup>, 2018 using PubMed. The following searches were performed to locate relevant papers related to rhythm: “rhythm AND (fMRI OR “Functional Magnetic Resonance”) NOT cardiac NOT sleep” , “rhythm AND (PET OR “Positron Emission Tomography”)” , “meter AND (fMRI OR “Functional Magnetic Resonance”)” , “meter AND (PET OR “Positron Emission Tomography”)” , “beat AND (fMRI OR “Functional Magnetic Resonance”)” , “beat AND (PET OR “Positron Emission Tomography”)” . Similarly, the following searches were performed to locate papers related to syntax processing: “(fMRI OR functional magnetic resonance imaging OR PET OR positron emission tomography) AND grammatical” , “(fMRI OR functional magnetic resonance imaging OR PET OR positron emission tomography) AND syntactic” , “(fMRI OR functional magnetic resonance imaging OR PET OR positron emission tomography) AND grammar” , “(fMRI OR functional magnetic resonance imaging OR PET OR positron emission tomography) AND syntax” . Additional rhythm papers were located by reviewing the citations of these nine review papers: (Fitch, 2013; Geiser et al., 2014; Grahn, 2012; Kotz et al., 2018; Merchant et al., 2015; Pearce and Rohrmeier, 2012; Repp and Su, 2013; Teki, 2016; Teki et al., 2012). The full process of

elimination is summarized according to PRISMA standards within Supplementary Materials S1 and S2 (Moher et al., 2009).

First, papers were screened based on titles. Due to the large quantity of papers identified by the PubMed database search, an in-house MATLAB script (2017a) was assembled to remove papers that were not in English or contained certain keywords in titles that are associated with EEG/MEG methods, clinical populations, developmental research, aging participants, or non-human subjects. The remaining papers were manually inspected to remove additional off-target results. Eligibility was assessed based on whether the paper reported foci of activation from whole-brain analyses and used fMRI acquisition paradigms that achieved whole brain coverage. Furthermore, experiments were excluded from analysis if they failed to control for domain-agnostic task-general cognitive resources such as working memory. Results contrasting musicians and non-musicians were also excluded. Since GingerALE software generates MA scores per each set of unique subjects in a study, papers reporting results from two independent populations count as two separate experiments (Chen et al., 2007; Goucha and Friederici, 2015), and multiple papers that report data from the same subjects (Vuust et al., 2011, 2006) are considered one experiment (Turkeltaub et al., 2012).

Initially, the rhythm literature search revealed a total of 32 experiments: 7 rhythm, 6 meter, 13 beat, and 6 studies that conflated rhythm, meter, and beat. Unfortunately, there were not enough papers within the scope of the present analysis to allow for running rhythm, meter, and beat as independent samples of experiments. To ensure that the rhythm analysis equally revealed areas associated with beat, meter, and rhythm processing, we down-sampled the number of experiments to match the number of studies from the meter category. Only the most recent experiments from the beat and rhythm categories were included. Accordingly, only the six newest experiments of each category were included for a total of 24 experiments engaging rhythm, beat, meter, and a mixture of these processes (**Table 1**). For the syntax analysis, the literature search discovered 50 syntax experiments: 16 experiments on merge, 13 experiments on movement, and 20 experiments on reanalysis (**Table 2**). For the overall syntax analysis, we included the 13 most recent papers from each category and ran them as a single population to ensure the activation revealed was associated with equal parts from merge, movement, and reanalysis processing. Because each subset had enough experiments, we were able to perform ALE analyses separately on merge, movement, and reanalysis experiments in addition to the general syntax domain. A full table listing the precise contrast and foci included from each experiment can be found in the Supplementary Materials Table 1.

| #                   | Authors                   | Category | Task                 | Sensory Modality | # Subjects | # Foci     |
|---------------------|---------------------------|----------|----------------------|------------------|------------|------------|
| 1                   | Araneda et al., 2017      | Beat     | Beat detection       | AUD, VIS & TAC   | 27         | 40         |
| 2                   | Geiser et al., 2012       | Beat     | Pseudopass. obs.     | AUD              | 17         | 2          |
| 3                   | Grahn and Rowe, 2013      | Beat     | Pseudopass. obs.     | AUD              | 24         | 19         |
| 4                   | Kung et al., 2012         | Beat     | Mixed tasks          | AUD              | 11         | 62         |
| 5                   | Marchant and Driver, 2013 | Beat     | Pseudopass. obs.     | AUD & VIS        | 16         | 11         |
| 6                   | McAuley et al., 2012      | Beat     | Discrimination       | AUD              | 15         | 61         |
| 7                   | Bolger et al., 2014       | Meter    | Pseudopass. obs.     | AUD & VIS        | 17         | 1          |
| 8                   | J. L. Chen et al., 2006   | Meter    | Production           | AUD              | 11         | 5          |
| 9                   | Danielsen et al., 2014    | Meter    | Passive obs.         | AUD              | 19         | 4          |
| 10                  | Thaut et al., 2008        | Meter    | Production           | AUD              | 12         | 6          |
| 11                  | Trost et al., 2014        | Meter    | Pseudopass. obs.     | AUD & VIS        | 18         | 10         |
| 12                  | Vuust et al., 2011, 2006  | Meter    | Production           | AUD              | 18         | 7          |
| 13                  | Bengtsson et al., 2004    | Rhythm   | Production           | AUD              | 7          | 11         |
| 14                  | Bengtsson et al., 2005    | Rhythm   | Production           | AUD              | 7          | 6          |
| 15                  | Foster and Zatorre, 2010  | Rhythm   | Same-diff. judgement | AUD              | 31         | 17         |
| 16                  | Jungblut et al., 2012     | Rhythm   | Production           | AUD              | 30         | 12         |
| 17                  | Penhune and Doyon, 2002   | Rhythm   | Production           | VIS              | 9          | 21         |
| 18                  | Riecker et al., 2002      | Rhythm   | Production           | AUD              | 12         | 5          |
| 19                  | Bengtsson et al., 2009    | Mixed    | Passive obs.         | AUD              | 17         | 19         |
| 20 & 21             | Chen et al., 2007         | Mixed    | Production           | AUD              | 12         | 15         |
|                     |                           |          |                      |                  | 12         | 14         |
| 22                  | Konoike et al., 2012      | Mixed    | Working memory       | AUD & VIS        | 17         | 32         |
| 23                  | Konoike et al., 2015      | Mixed    | Working memory       | AUD              | 23         | 20         |
| 24                  | Sakreida et al., 2017     | Mixed    | Production           | VIS              | 28         | 15         |
| <b>Grand Total:</b> |                           |          |                      |                  | <b>410</b> | <b>415</b> |

**Table 1: All experiments included in the rhythm ALE analysis.** AUD: auditory; VIS: visual; TAC: tactile; Pseudopass. obs.: pseudopassive observation; Passive obs: passive observation; Same-diff. judgement: same-different judgement.

| #       | Authors                             | Category   | Task                 | Sensory Modality | # Subjects | # Foci |
|---------|-------------------------------------|------------|----------------------|------------------|------------|--------|
| 25      | Bonhage et al., 2014                | Merge      | Recall               | VIS              | 18         | 28     |
| 26      | Bozic et al., 2015                  | Merge      | Pseudopass. obs.     | AUD              | 18         | 7      |
| 27      | Bulut et al., 2017                  | Merge      | Pseudopass. obs.     | VIS              | 24         | 7      |
| 28      | Chan et al., 2013                   | Merge      | Covert production    | VIS              | 24         | 7      |
| 29 & 30 | Goucha and Friederici, 2015         | Merge      | Pseudopass. obs.     | AUD & VIS        | 23<br>32   | 8<br>4 |
| 31      | Hillen et al., 2013                 | Merge      | Pseudopass. obs.     | VIS              | 20         | 6      |
| 32      | Hung et al., 2015                   | Merge      | Overt production     | VIS              | 40         | 8      |
| 33      | Ohta et al., 2013                   | Merge      | Pseudopass. obs.     | VIS              | 18         | 11     |
| 34      | Schell et al., 2017                 | Merge      | Pseudopass. obs.     | AUD              | 21         | 7      |
| 35      | Snijders et al., 2009               | Merge      | Pseudopass. obs.     | VIS              | 28         | 24     |
| 36      | Stowe et al., 1999*                 | Merge      | Passive obs.         | VIS              | 12         | 8      |
| 37      | Tyler et al., 2008                  | Merge      | Pseudopass. obs.     | VIS              | 15         | 8      |
| 38      | Yang et al., 2017                   | Merge      | Pseudopass. obs.     | AUD              | 18         | 7      |
| 39      | Zaccarella et al., 2017             | Merge      | Pseudopass. obs.     | VIS              | 18         | 2      |
| 40      | Zhuang and Devereux, 2017           | Merge      | Pseudopass. obs.     | AUD              | 16         | 6      |
| 41      | Feng et al., 2015                   | Movement   | Sent.-pict. matching | VIS              | 18         | 8      |
| 42      | Koizumi and Kim, 2016               | Movement   | Pseudopass. obs.     | AUD              | 16         | 1      |
| 43      | Kristensen et al., 2014             | Movement   | Pseudopass. obs.     | AUD & VIS        | 32         | 4      |
| 44      | Ohta et al., 2017                   | Movement   | Sent.-pict. matching | AUD & VIS        | 17         | 26     |
| 45      | Rogalsky et al., 2015               | Movement   | Pseudopass. obs.     | AUD              | 15         | 11     |
| 46      | Santi et al., 2015                  | Movement   | Pseudopass. obs.     | VIS              | 21         | 8      |
| 47      | Santi and Grodzinsky, 2010          | Movement   | Pseudopass. obs.     | AUD              | 17         | 1      |
| 48      | Santi and Grodzinsky, 2012          | Movement   | Pseudopass. obs.     | AUD              | 14         | 11     |
| 49      | Shetreet and Friedmann, 2012        | Movement   | Pseudopass. obs.     | AUD              | 23         | 4      |
| 50      | Shetreet and Friedmann, 2014        | Movement   | Pseudopass. obs.     | AUD              | 22         | 6      |
| 51      | Shetreet et al., 2009               | Movement   | Pseudopass. obs.     | AUD              | 19         | 12     |
| 52      | Tanaka et al., 2017                 | Movement   | Sent.-pict. matching | VIS              | 16         | 11     |
| 53      | Ye and Zhou, 2009                   | Movement   | Pseudopass. obs.     | VIS              | 21         | 4      |
| 54      | Bornkessel-Schlesewsky et al., 2009 | Reanalysis | Pseudopass. obs.     | VIS              | 30         | 7      |
| 55      | Caplan et al., 2007*                | Reanalysis | Pseudopass. obs.     | VIS              | 15         | 13     |
| 56      | Caplan et al., 2008                 | Reanalysis | Pseudopass. obs.     | VIS              | 16         | 14     |
| 57      | E. Chen et al., 2006*               | Reanalysis | Pseudopass. obs.     | VIS              | 12         | 28     |
| 58      | Cooke et al., 2001*                 | Reanalysis | Pseudopass. obs.     | VIS              | 7          | 7      |
| 59      | Hsu et al., 2017                    | Reanalysis | Pseudopass. obs.     | VIS              | 28         | 7      |
| 60      | Kinno et al., 2008*                 | Reanalysis | Sent.-pict. matching | VIS              | 14         | 3      |
| 61      | Kristensen et al., 2013             | Reanalysis | Pseudopass. obs.     | VIS              | 21         | 10     |
| 62      | Kunert et al., 2015                 | Reanalysis | Pseudopass. obs.     | AUD & VIS        | 19         | 1      |
| 63      | Lee and Newman, 2009                | Reanalysis | Pseudopass. obs.     | VIS              | 18         | 12     |



|                     |                           |            |                  |           |     |     |
|---------------------|---------------------------|------------|------------------|-----------|-----|-----|
| 64                  | Lee et al., 2016          | Reanalysis | Pseudopass. obs. | VIS       | 26  | 21  |
| 65                  | Lee et al., 2018          | Reanalysis | Pseudopass. obs. | VIS       | 35  | 3   |
| 66                  | Meltzer et al., 2010      | Reanalysis | Mixed tasks      | AUD & VIS | 24  | 8   |
| 67                  | Ogawa et al., 2008        | Reanalysis | Pseudopass. obs. | VIS       | 21  | 7   |
| 68                  | Pattamadilok et al., 2016 | Reanalysis | Pseudopass. obs. | VIS       | 20  | 26  |
| 69                  | Peelle et al., 2004*      | Reanalysis | Pseudopass. obs. | AUD       | 8   | 2   |
| 70                  | Prat and Just, 2011       | Reanalysis | Pseudopass. obs. | VIS       | 27  | 19  |
| 71                  | Röder et al., 2002*       | Reanalysis | Pseudopass. obs. | AUD       | 11  | 5   |
| 72                  | Rogalsky et al., 2008     | Reanalysis | Pseudopass. obs. | AUD       | 15  | 7   |
| 73                  | Shetreet et al., 2009     | Reanalysis | Pseudopass. obs. | AUD       | 19  | 12  |
| <b>Grand Total:</b> |                           |            |                  |           | 981 | 467 |

**Table 2: All experiments included in the syntax ALE analysis.** VIS: visual; AUD: auditory; Pseudopass. obs.: pseudopassive observation; Passive obs.: passive observation; Sent.-pict. matching: sentence-picture matching. Asterisks indicate studies that were excluded when the syntax experiments were run as one sample.

### 2.3 Analysis Procedure

ALE analyses were performed on the rhythm and syntax foci sets independently using GingerALE (version 2.3.6, brainmap.org) (Eickhoff et al., 2012, 2009; Turkeltaub et al., 2012). To this end, foci originally reported in Talairach coordinates were transformed into common MNI space using the built-in *icbm2tal* function (Lancaster et al., 2007). Statistical analysis of the transformed foci was validated using Monte Carlo Simulation (1,000 permutations) with cluster-forming voxel-level threshold at uncorrected  $P < 0.001$  combined with cluster-size correction using family-wise error at  $P < 0.05$  (Eickhoff et al., 2016). Cluster statistics for overlapping ALE maps were generated with GingerALE using the Contrast Studies function. The algorithm assigns a value to each voxel that overlaps between two maps by reporting the minimum ALE value in the voxel between the two overlapping maps. The final  $P$  maps generated by GingerALE have been uploaded to NeuroVault, accessible at <https://identifiers.org/neurovault.collection:5539> (Gorgolewski et al., 2015).

For any given clusters across each map, we report the following two coordinates: 1) weighted center (WC) and 2) extrema value (EV). Whereas the WC represents the centroid of a cluster, EVs represent a local maximum ALE score within a significant cluster. Anatomical labels of each coordinate were queried via the SPM Anatomy toolbox (Eickhoff et al., 2007, 2006, 2005). Finally, resulting ALE maps were displayed using multi-slice and surface views generated using Mango software (<http://ric.uthscsa.edu/mango/>) and the high-resolution MNI-space Colin 27 template provided by GingerALE (<http://brainmap.org/ale/>).

### 3. Results

#### 3.1 Rhythm

The rhythm ALE analysis revealed significant clusters in both hemispheres of the brain, most of which were symmetrically mirrored (**Figure 2, Table 3**). The most notable clusters appeared bilaterally in the dorsolateral (pars Opercularis) part of the inferior frontal gyrus (IFG). Another pair of notable clusters emerged within the bilateral basal ganglia, including tissue from the caudate head, putamen, and the globus pallidus. Additional bilateral clusters emerged in the supplementary motor area (SMA)—including the pre-SMA—superior temporal gyrus (STG)/temporoparietal junction (TPJ), inferior parietal lobule (IPL), and insula. Some areas emerged in a single hemisphere. For example, the premotor cortex (PMC) and precentral gyrus emerged in the right hemisphere, while the cerebellum (Crus I) appeared in the left hemisphere.

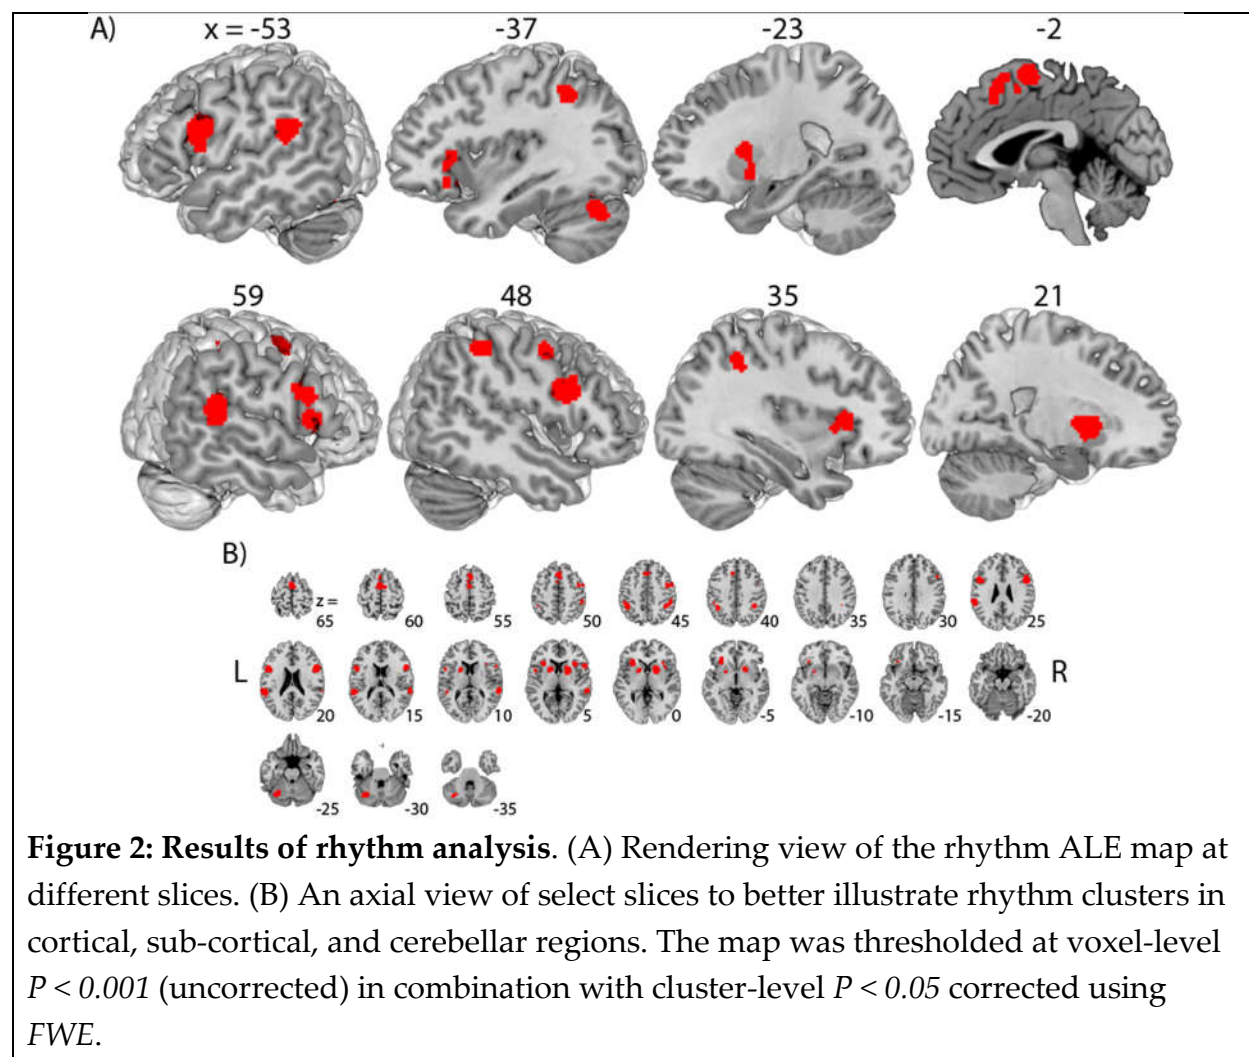

| Hemi. | Vol. | WC    |       |       | WC Label<br>(Anatomy)      | EV  |     |     | EV Label<br>(Anatomy)      | Contributing<br>Experiments          |
|-------|------|-------|-------|-------|----------------------------|-----|-----|-----|----------------------------|--------------------------------------|
|       |      | x     | y     | z     |                            | x   | y   | z   |                            |                                      |
| R     | 3248 | 52.4  | 11.6  | 18.8  | IFG (pars. Opercularis)    | 52  | 10  | 20  | IFG (pars Opercularis)     | 1, 4, 5, 6, 9, 15, 18,<br>22, 23, 24 |
|       |      |       |       |       |                            | 56  | 16  | 6   | IFG (pars Opercularis)     |                                      |
| R     | 2272 | 19    | 7.6   | 1     | Pallidum/Putamen*          | 18  | 10  | 0   | None                       | 1, 2, 4, 5, 6, 13, 24                |
| L     | 2264 | -49.3 | 9.6   | 19.1  | IFG (pars Opercularis)     | -50 | 10  | 20  | IFG (pars Opercularis)     | 1, 4, 6, 15, 16, 22,<br>23, 24       |
|       |      |       |       |       |                            | -42 | 6   | 24  | IFG (pars Opercularis)     |                                      |
|       |      |       |       |       |                            | -48 | 6   | 6   | IFG (pars Opercularis)     |                                      |
| L     | 2152 | -0.2  | -3.2  | 62.2  | Post-Med. Frontal/SMA*     | -2  | -2  | 62  | Post-Med. Frontal/SMA*     | 1, 3, 10, 15, 19, 20,<br>21, 24      |
| L     | 2136 | -57.7 | -38.2 | 19.7  | STG/TPJ*                   | -58 | -40 | 20  | STG/TPJ*                   | 1, 6, 8, 9, 13, 14,<br>15, 22, 24    |
|       |      |       |       |       |                            | -48 | -38 | 10  | STG/TPJ*                   |                                      |
| R & L | 2096 | -0.6  | 18    | 50.4  | Post-Med. Frontal/pre-SMA* | 2   | 16  | 52  | Post-Med. Frontal/pre-SMA* | 1, 4, 6, 13, 15, 16,<br>19, 20, 21   |
|       |      |       |       |       |                            | -6  | 24  | 42  | Supramarginal Gyrus        |                                      |
|       |      |       |       |       |                            | -2  | 14  | 60  | Post-Med. Frontal/pre-SMA* |                                      |
|       |      |       |       |       |                            | 4   | 26  | 48  | Supramarginal Gyrus        |                                      |
|       |      |       |       |       |                            | -4  | 6   | 52  | Post-Med. Frontal/pre-SMA* |                                      |
| L     | 1728 | -31.5 | 24.5  | -1.8  | Insula                     | -32 | 22  | 2   | Insula                     | 1, 4, 5, 12, 15, 16,<br>22, 24       |
|       |      |       |       |       |                            | -34 | 26  | -12 | IFG (pars Orbitalis)       |                                      |
| L     | 1576 | -32.1 | -66   | -28.2 | Cerebellum (Crus 1)        | -34 | -66 | -28 | Cerebellum (Crus 1)        | 1, 13, 15, 20, 21,<br>22, 23, 24     |
| L     | 1432 | -18.5 | 7.3   | 3.8   | Pallidum                   | -18 | 8   | 8   | Putamen                    | 1, 2, 3, 4, 6, 23, 24                |
|       |      |       |       |       |                            | -22 | 4   | -8  | Putamen                    |                                      |
| R     | 1424 | 61.5  | -36.2 | 10.9  | STG/TPJ*                   | 62  | -36 | 8   | STG/TPJ*                   | 1, 4, 6, 9, 18, 24                   |
| R     | 1288 | 43.5  | -42.4 | 44.3  | IPL                        | 38  | -46 | 42  | IPL                        | 1, 10, 22, 23, 24                    |
|       |      |       |       |       |                            | 50  | -38 | 46  | IPL                        |                                      |
| L     | 1288 | -42.2 | -45.8 | 43.5  | IPL                        | -42 | -46 | 46  | IPL                        | 1, 7, 21, 22, 23, 24                 |
|       |      |       |       |       |                            | -38 | -50 | 40  | IPL                        |                                      |
|       |      |       |       |       |                            | -48 | -40 | 44  | IPL                        |                                      |
| R     | 1056 | 46.6  | -1.6  | 46.5  | Precentral Gyrus/PMC*      | 52  | -2  | 46  | Precentral Gyrus/PMC*      | 1, 4, 6, 15, 21, 24                  |
|       |      |       |       |       |                            | 42  | 0   | 48  | Precentral Gyrus/PMC*      |                                      |
| R     | 768  | 35    | 19.4  | 3.9   | Insula                     | 34  | 20  | 6   | Insula                     | 1, 4, 5, 15                          |

**Table 3: Rhythm clusters found by ALE analysis.** WC: the weighted center of the cluster; EV: the extrema value; IFG: inferior frontal gyrus; Post-Med. Frontal: posterior-medial frontal; STG: superior temporal gyrus; TPJ: tempoparietal junction; IPL: intraparietal lobule; PMC: premotor cortex. Asterisk indicates that the second anatomical label was assigned manually by the authors.

### 3.2 Syntax

Unlike the rhythm ALE analysis, the syntax analysis yielded significant clusters predominantly in the left hemisphere with the exception of the right insula. The most notable cluster spanned both the pars Triangularis and Opercularis regions of the left IFG, running dorsally into the middle frontal gyrus and ventrally into the insula. Another notable cluster appeared in the middle and posterior aspects of the middle and superior temporal gyri. Outside of the fronto-temporal regions, sizable clusters were located in the SMA, left PMC, and left intraparietal lobule (IPL), yet no significant clusters emerged within the basal ganglia (**Figure 3A, Table 4**).

Next, we performed a series of ALE analyses on each subset of syntax experiments: merge, movement, and reanalysis (**Figure 3B, Table 4**). For merge, three significant clusters emerged within the left hemisphere: within the pars Triangularis of the IFG, the anterior STG, and posterior STG/MTG. For movement, significant clusters emerged in the left IFG encompassing both the pars Triangularis and Opercularis, the left PMC, and pre-SMA. Compared to the other two syntactic processes, reanalysis recruited more widespread regions. The largest cluster was found within the left IFG, which extended into the middle frontal gyrus and PMC. Several other regions were recruited including the posterior STG/MTG, pre-SMA, IPL, and PMC on the left hemisphere, as well as the right insula. Individual maps of merge, movement, and reanalysis can be found in the Supplementary Materials S3, S4, and S5.

These three sub-syntax maps were then overlaid to determine the common regions across different syntactic processes (**Figure 3B**). Tripartite overlap was seen mostly in the dorsolateral part of the left IFG (pars Opercularis, **Table 5**). However, there were several pair-wise overlaps throughout the left frontotemporal network. For example, in the left IFG, overlap was seen between merge and movement within the ventrolateral part (pars Triangularis). In SMA and PMC, overlap was seen between merge and reanalysis. In the temporal lobe, both merge and reanalysis recruit the posterior STG (**Table 5**).

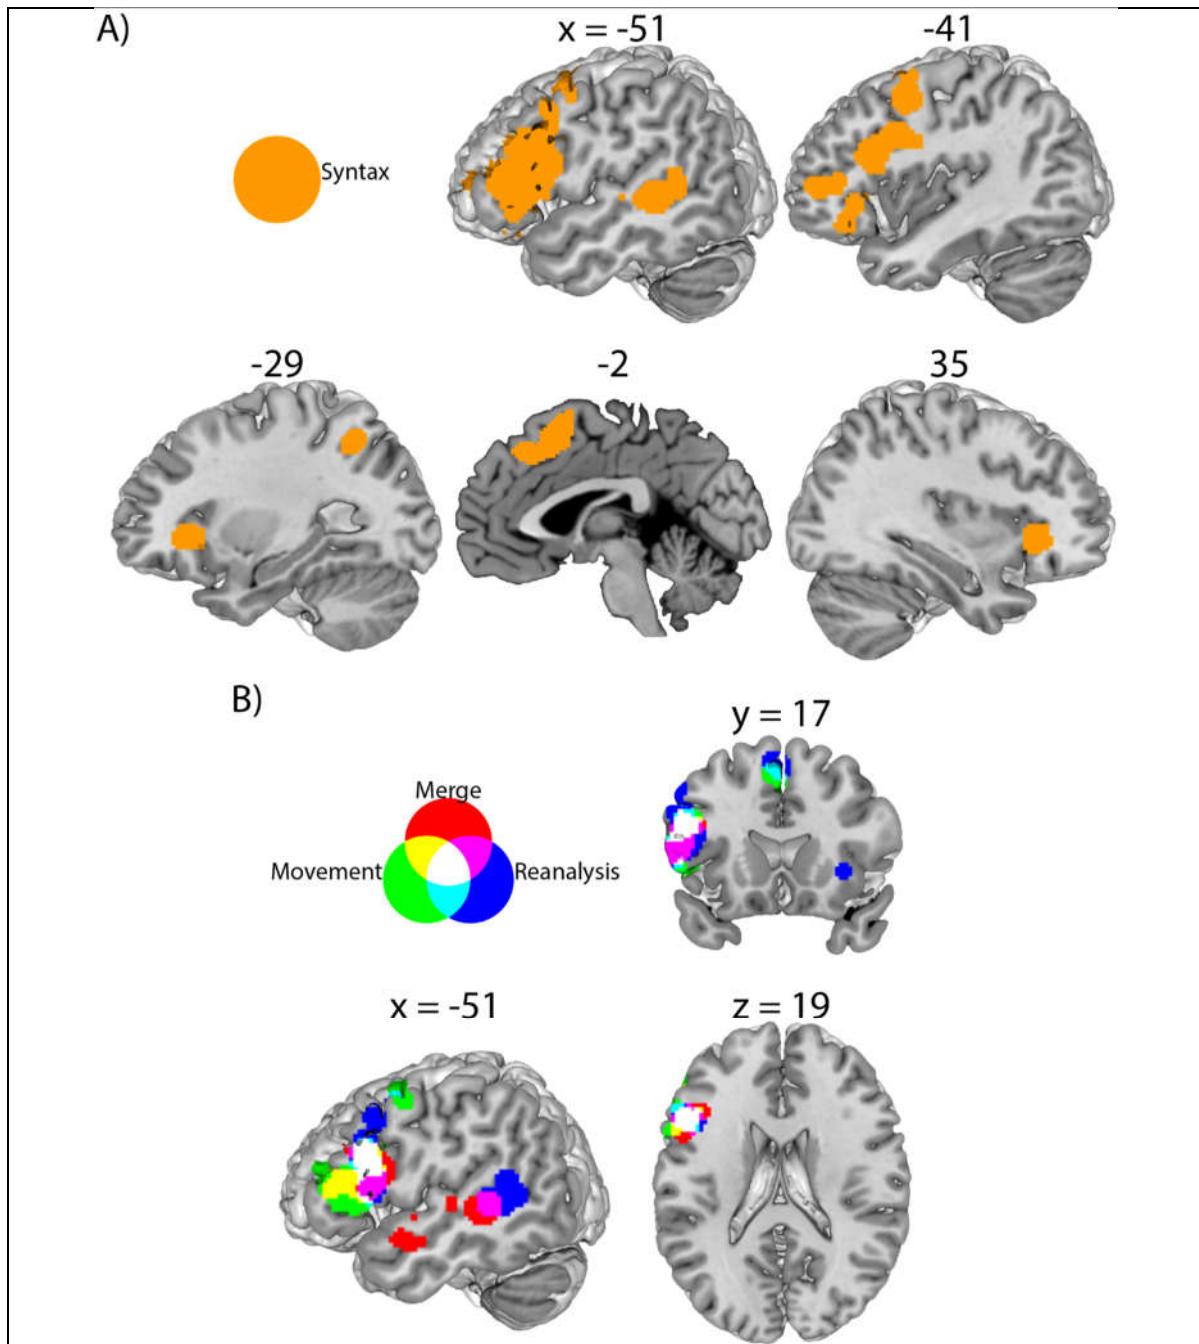

**Figure 3: Areas engaged in syntax processes.** (A) Renders of the combined syntax analysis, from the left and right hemisphere with slices (from left to right, top to bottom)  $x = [-51, -41, -29, -2, 35]$ . (B) Syntactic sub-types juxtaposed on the same rendering template. All maps were thresholded with voxel-level  $P < 0.001$  (uncorrected) in combination with cluster-level  $P < 0.05$  corrected using *FWE*. Data in (A) was generated from a down-sampled selection of syntax papers (see Methods), while (B) features all merge, movement, and reanalysis experiments.

| Hemi. | Vol.  | WC    |       |      | WC Label<br>(Anatomy)      | EV  |     |     | EV Label<br>(Anatomy)      | Contributing<br>Experiments                                                                                                            |
|-------|-------|-------|-------|------|----------------------------|-----|-----|-----|----------------------------|----------------------------------------------------------------------------------------------------------------------------------------|
|       |       | x     | y     | z    |                            | x   | y   | z   |                            |                                                                                                                                        |
| L     | 17464 | -47.5 | 21.4  | 11.1 | IFG (pars Triangularis)    | -50 | 16  | 18  | IFG (pars Opercularis)     | 25, 28, 29, 30, 32, 33, 34,<br>35, 36, 37, 38, 39, 40, 41,<br>43, 44, 45, 47, 48, 49, 50,<br>51, 53, 54, 55, 56, 58, 60,<br>61, 62, 63 |
|       |       |       |       |      |                            | -54 | 30  | 10  | IFG (pars Triangularis)    |                                                                                                                                        |
|       |       |       |       |      |                            | -32 | 26  | -2  | Insula                     |                                                                                                                                        |
|       |       |       |       |      |                            | -48 | 26  | -4  | IFG (pars Orbitalis)       |                                                                                                                                        |
|       |       |       |       |      |                            | -46 | 36  | 6   | IFG (pars Triangularis)    |                                                                                                                                        |
|       |       |       |       |      |                            | -44 | 44  | 4   | IFG (pars Triangularis)    |                                                                                                                                        |
|       |       |       |       |      |                            | -42 | 4   | 28  | IFG (pars Opercularis)     |                                                                                                                                        |
|       |       |       |       |      |                            | -42 | 32  | -14 | IFG (pars Orbitalis)       |                                                                                                                                        |
| L     | 4520  | -3    | 17    | 50.8 | Post-Med. Frontal/pre-SMA* | -2  | 16  | 50  | Post-Med. Frontal/pre-SMA* | 28, 31, 32, 33, 40, 41, 49,<br>51, 52, 53, 55, 56, 58, 60, 61                                                                          |
|       |       |       |       |      |                            | -4  | 28  | 42  | Superior Medial Gyrus      |                                                                                                                                        |
| L     | 4376  | -54.6 | -35.7 | 1.1  | MTG                        | -56 | -42 | 2   | MTG                        | 26, 28, 29, 30, 34, 35, 36,<br>37, 47, 53, 55, 57, 60, 63                                                                              |
|       |       |       |       |      |                            | -54 | -36 | 0   | MTG                        |                                                                                                                                        |
|       |       |       |       |      |                            | -58 | -22 | 0   | MTG                        |                                                                                                                                        |
|       |       |       |       |      |                            | -48 | -46 | 10  | MTG                        |                                                                                                                                        |
| L     | 2032  | -42   | 2.3   | 48.1 | Precentral Gyrus/PMC*      | -42 | 2   | 48  | Precentral Gyrus/PMC*      | 38, 41, 49, 53, 55, 58, 60, 61                                                                                                         |
|       |       |       |       |      |                            | -38 | 2   | 58  | Precentral Gyrus/PMC*      |                                                                                                                                        |
| R     | 1288  | 33.3  | 25.1  | -3.7 | Insula                     | 32  | 24  | -4  | Insula                     | 28, 40, 51, 53, 56, 60                                                                                                                 |
| L     | 928   | -30.4 | -57   | 45.3 | IPL                        | -30 | -58 | 46  | IPL                        | 33, 51, 53, 55, 59, 60                                                                                                                 |

**Table 4: Clusters found by the combined syntax ALE analysis.** WC: the weighted center of the cluster; EV: the extrema value; IFG: inferior frontal gyrus; MFG: middle frontal gyrus; MTG: middle temporal gyrus; STG: superior temporal gyrus; Post.-Med. Frontal: posterior-medial frontal; SMA: supplementary motor area; PMC: premotor cortex; IPL; intraparietal lobule. Asterisk indicates that the second anatomical label was assigned manually by the authors.

|            | Hemi. | Vol.  | WC    |                       |                       | WC Label<br>(Anatomy)       | EV  |     |                       | EV Label<br>(Anatomy)       | Contributing<br>Experiments                   |
|------------|-------|-------|-------|-----------------------|-----------------------|-----------------------------|-----|-----|-----------------------|-----------------------------|-----------------------------------------------|
|            |       |       | x     | y                     | z                     |                             | x   | y   | z                     |                             |                                               |
| Merge      | L     | 5688  | -50.9 | 19.8                  | 12.8                  | IFG (pars Triangularis)     | -50 | 12  | 16                    | IFG (pars Opercularis)      | 28, 29, 30, 32, 34,<br>35, 36, 37, 38, 39, 40 |
|            |       |       |       |                       |                       |                             | -54 | 20  | 8                     | IFG (pars Triangularis)     |                                               |
|            |       |       |       |                       |                       |                             | -54 | 26  | 10                    | IFG (pars Triangularis)     |                                               |
|            |       |       |       |                       |                       |                             | -44 | 36  | 4                     | IFG (pars Triangularis)     |                                               |
|            |       |       |       |                       |                       |                             | -42 | 20  | 22                    | IFG (pars Triangularis)     |                                               |
|            | L     | 3640  | -54.8 | -31.9                 | -0.8                  | MTG                         | -52 | -34 | -2                    | MTG                         | 26, 28, 29, 30, 34,                           |
|            |       |       |       |                       |                       |                             | -58 | -22 | 0                     | MTG                         | 35, 37, 38, 39, 40                            |
|            | L     | 1320  | -55.1 | -2.8                  | -14.1                 | STG                         | -54 | 2   | -16                   | MTG                         | 25, 26, 31, 34, 35, 36                        |
|            |       |       |       |                       |                       |                             | -56 | -6  | -16                   | MTG                         |                                               |
|            |       |       |       |                       |                       |                             | -56 | -6  | -6                    | STG                         |                                               |
| Movement   | L     | 5648  | -50.8 | 22                    | 13.7                  | IFG (pars Triangularis)     | -54 | 30  | 4                     | IFG (pars Triangularis)     | 41, 43, 44, 46, 47,<br>50, 51, 52, 53         |
|            |       |       |       |                       |                       |                             | -50 | 18  | 22                    | IFG (pars Triangularis)     |                                               |
|            |       |       |       |                       |                       |                             | -52 | 34  | 10                    | IFG (pars Triangularis)     |                                               |
|            |       |       |       |                       |                       |                             | -54 | 24  | 14                    | IFG (pars Triangularis)     |                                               |
|            |       |       |       |                       |                       |                             | -58 | 12  | 14                    | IFG (pars Opercularis)      |                                               |
|            |       |       |       |                       |                       |                             | -38 | 6   | 34                    | Precentral Gyrus/PMC*       |                                               |
|            |       |       |       |                       |                       |                             | -42 | 22  | 16                    | IFG (pars Triangularis)     |                                               |
|            | -42   | 2     | 26    | Precentral Gyrus/PMC* |                       |                             |     |     |                       |                             |                                               |
|            | L     | 1408  | -44.6 | 1.4                   | 47.9                  | Precentral Gyrus/PMC*       | -44 | 0   | 46                    | Precentral Gyrus/PMC*       | 41, 44, 50, 52                                |
|            | L     | 904   | -2.4  | 17                    | 46.3                  | Post.-Med. Frontal/pre-SMA* | -4  | 16  | 48                    | Post.-Med. Frontal/pre-SMA* | 43, 44, 52                                    |
| Reanalysis | L     | 6040  | -51.5 | 16.4                  | 17.6                  | IFG (pars Opercularis)      | -48 | 16  | 12                    | IFG (pars Opercularis)      | 55, 56, 57, 58, 61,                           |
|            |       |       |       |                       |                       |                             | -52 | 18  | 26                    | IFG (pars Triangularis)     | 62, 63, 65, 67, 69,                           |
|            |       |       |       |                       |                       |                             | -56 | 14  | 38                    | Precentral Gyrus/PMC*       | 71, 72, 73, 74                                |
|            | L     | 3152  | -53.2 | -43.9                 | 3.2                   | MTG                         | -56 | -44 | 2                     | MTG                         | 56, 57, 61, 62, 66,                           |
|            |       |       |       |                       |                       |                             | -52 | -46 | 2                     | MTG                         | 69, 72, 74                                    |
|            | L     | 2480  | -2.6  | 12.8                  | 54.9                  | Post.-Med. Frontal/pre-SMA* | -2  | 14  | 52                    | Post.-Med. Frontal/pre-SMA* | 60, 62, 64, 65, 67,<br>69, 71, 72             |
|            | R     | 1704  | 32.7  | 24.4                  | -2.7                  | Insula                      | 34  | 24  | -2                    | Insula                      | 55, 58, 62, 65, 69, 72                        |
|            | L     | 1360  | -31.8 | -55.5                 | 44.1                  | IPL                         | -34 | -56 | 46                    | IPL                         | 55, 58, 62, 64, 68, 69                        |
| L          | 1184  | -39.5 | 3.2   | 45.2                  | Precentral Gyrus/PMC* | -40                         | 2   | 46  | Precentral Gyrus/PMC* | 61, 67, 68, 69, 71          |                                               |



|         |   |      |       |      |      |                         |     |    |    |                         |
|---------|---|------|-------|------|------|-------------------------|-----|----|----|-------------------------|
| Overlap | L | 1176 | -50.1 | 17.1 | 19.9 | IFG (pars Opercularis)  | -56 | 12 | 14 | IFG (pars Opercularis)  |
|         |   |      |       |      |      |                         | -54 | 20 | 14 | IFG (pars Triangularis) |
|         |   |      |       |      |      |                         | -50 | 18 | 22 | IFG (pars Triangularis) |
|         | L | 24   | -53.4 | 20.1 | 2.7  | IFG (pars Triangularis) | -54 | 20 | 2  | IFG (pars Triangularis) |

**Table 5: Syntax clusters found by ALE analysis of merge, movement, and reanalysis.** WC: the weighted center of the cluster; EV: the extrema value; IFG: inferior frontal gyrus; MTG: middle temporal gyrus; STG: superior temporal gyrus; PMC: premotor cortex; Post.-Med. Frontal: posterior-medial frontal; SMA: supplementary motor area; IPL; intraparietal lobule. Asterisk indicates that the second anatomical label was assigned manually by the authors.

### *3.3 Overlap between Rhythm and Syntax*

After we delineated ALE maps for both rhythm and syntax, we generated maps for overlap between the two. This revealed overlapping clusters in the dorsolateral part of the left IFG (pars Opercularis), the left SMA, and the bilateral insula with more pronounced activity in the left hemisphere. Although no overlap was seen in the posterior aspect of the left STG, a rhythm cluster was located just superior to a syntax cluster in this region (**Figure 4, Table 6**).

Next, we explored overlaps between rhythm and each syntax operation: merge, movement, and reanalysis (**Table 7**). Whereas merge and rhythm only shared a single cluster in the dorsolateral aspect of the left IFG (pars Opercularis, **Figure 5A**), both movement and reanalysis exhibited overlaps with rhythm in the left IFG (pars Opercularis) and the SMA (**Figure 5B**). Reanalysis also exhibited additional clusters in the IPL and right insula (**Figure 5C**).

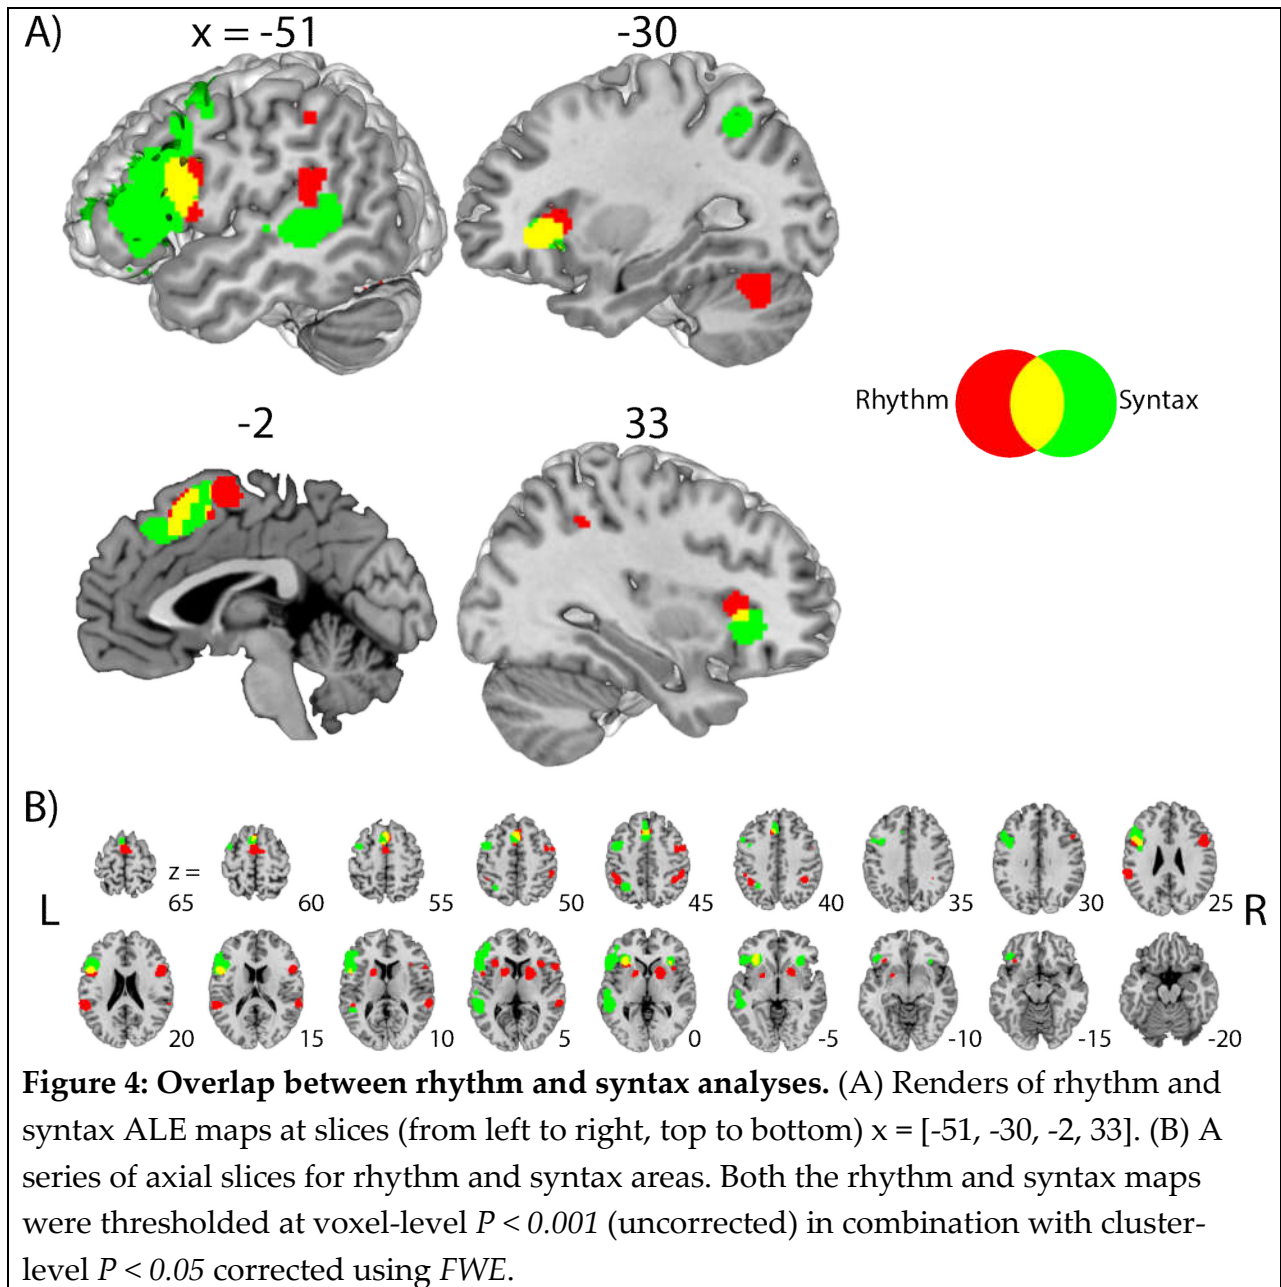

| Hemi. | Vol. | WC    |      |      | WC Label<br>(Anatomy)          | EV  |    |    | EV Label<br>(Anatomy)       |
|-------|------|-------|------|------|--------------------------------|-----|----|----|-----------------------------|
|       |      | x     | y    | z    |                                | x   | y  | z  |                             |
| L     | 1552 | -49.6 | 11.1 | 19.1 | IFG (pars<br>Opercularis)      | -50 | 12 | 18 | IFG (pars Opercularis)      |
|       |      |       |      |      |                                | -42 | 8  | 26 | IFG (pars Opercularis)      |
| L     | 1312 | -0.9  | 18.3 | 50.6 | Post.-Med.<br>Frontal/pre-SMA* | 2   | 16 | 52 | Post.-Med. Frontal/pre-SMA* |
|       |      |       |      |      |                                | -6  | 24 | 42 | Sup.-Med. Gyrus/pre-SMA*    |
|       |      |       |      |      |                                | -2  | 14 | 60 | Post.-Med. Frontal/pre-SMA* |
| L     | 1008 | -31.1 | 26.5 | -2.8 | Insula                         | -32 | 24 | 0  | Insula                      |
| R     | 72   | 33.1  | 22.7 | 0.9  | Insula                         | 32  | 24 | 2  | Insula                      |
| L     | 48   | -4    | 6.3  | 54.3 | Post.-Med.<br>Frontal/pre-SMA* | -4  | 6  | 54 | Post.-Med. Frontal/pre-SMA* |
| L     | 8    | 0     | 8    | 52   | Post.-Med.<br>Frontal/pre-SMA* | 0   | 8  | 52 | Post.-Med. Frontal/pre-SMA* |

**Table 6: Overlapping clusters between rhythm and all syntax.** WC: the weighted center of the cluster; EV: the extrema value; IFG: inferior frontal gyrus; Post.-Med. Frontal: posterior-medial frontal; Sup.-Med. Gyrus: superior medial gyrus; SMA: supplementary motor area. Asterisk indicates that the second anatomical label was assigned manually by the authors.

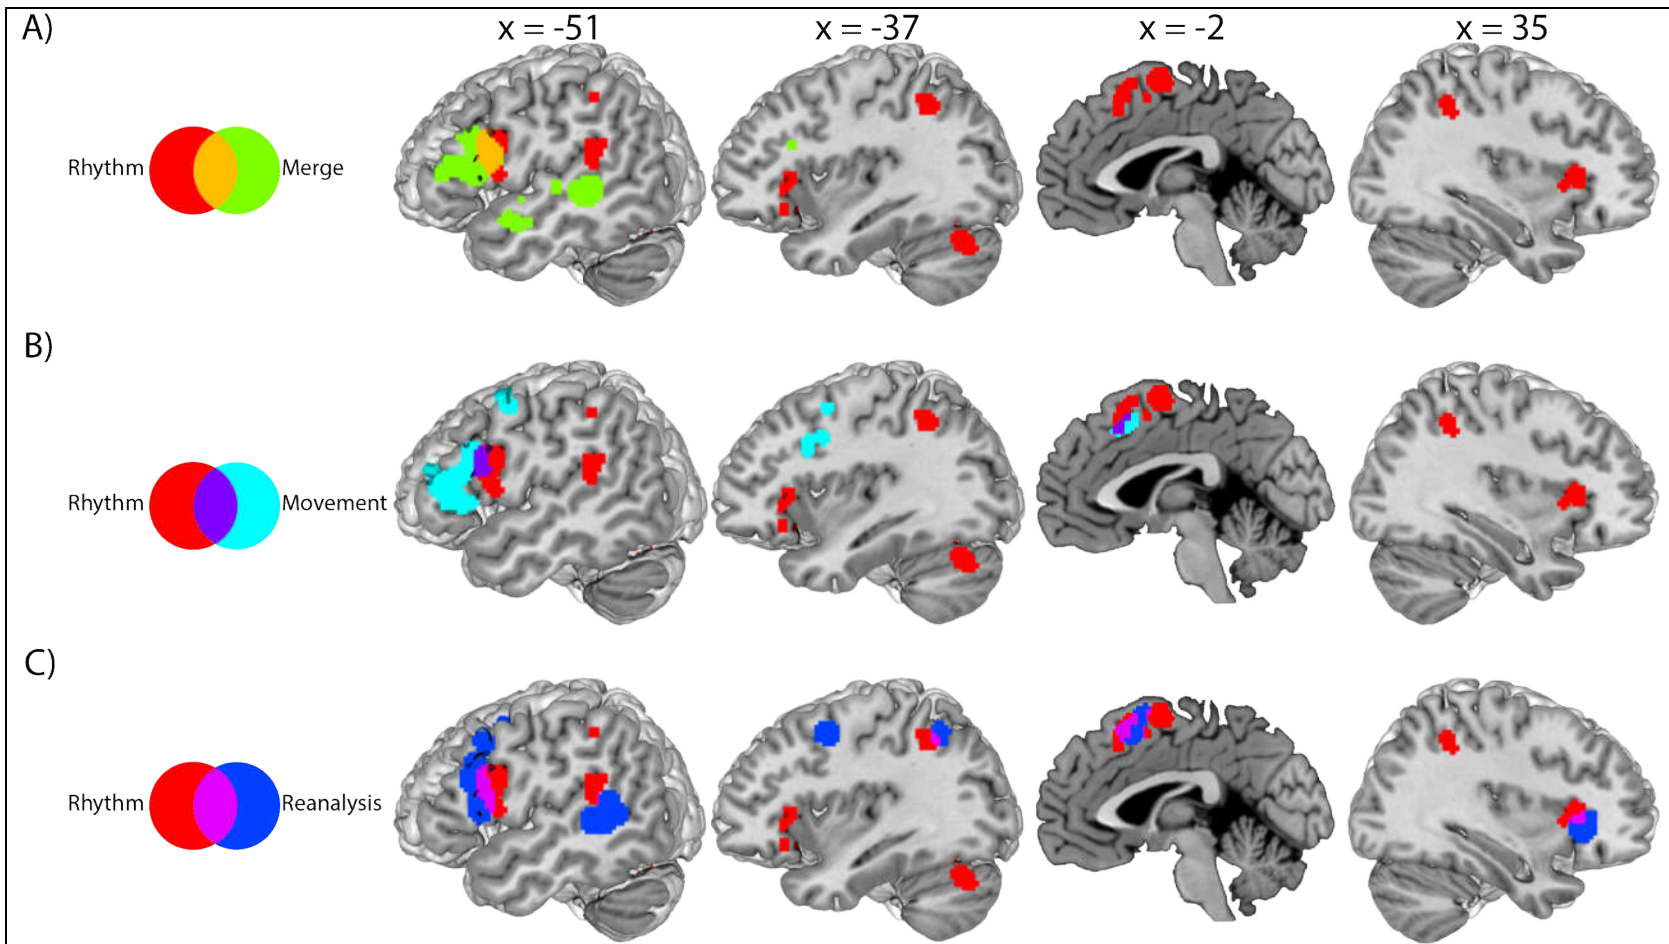

**Figure 5: A series of sagittal slices depicting the degree of overlap between rhythm and each subset of syntax regions.** (A) Rhythm and merge overlap at the pars Opercularis of the left IFG. (B) Rhythm and movement overlap in both the left IFG and pre-SMA. (C) Rhythm and reanalysis overlaps in the left IFG, left IPL, left SMA, and the right insula. All maps were thresholded at voxel-level  $P < 0.001$  (uncorrected) in combination with cluster-level  $P < 0.05$  corrected using FWE.

|                     | Hemi. | Vol. | WC    |      |      | WC Label<br>(Anatomy)       | EV  |     |    | EV Label<br>(Anatomy)       |
|---------------------|-------|------|-------|------|------|-----------------------------|-----|-----|----|-----------------------------|
|                     |       |      | x     | y    | z    |                             | x   | y   | z  |                             |
| Rhythm & Merge      | L     | 1112 | -50.9 | 11.8 | 17   | IFG (pars Opercularis)      | -50 | 12  | 18 | IFG (pars Opercularis)      |
|                     | L     | 688  | -49.5 | 13.2 | 20.1 | IFG (pars Opercularis)      | -50 | 16  | 22 | IFG (pars Opercularis)      |
| Rhythm & Movement   | L     | 160  | -0.7  | 21.4 | 44.1 | Post.-Med. Frontal/pre-SMA* | 0   | 20  | 44 | Post.-Med. Frontal/pre-SMA* |
|                     | L     | 64   | -1.3  | 16.5 | 49.7 | Post.-Med. Frontal/pre-SMA* | -2  | 16  | 50 | Post.-Med. Frontal/pre-SMA* |
|                     | L     | 784  | 0.2   | 16.2 | 53.2 | Post.-Med. Frontal/pre-SMA* | 2   | 16  | 52 | Post.-Med. Frontal/pre-SMA* |
|                     | L     |      |       |      |      |                             | -4  | 14  | 60 | Post.-Med. Frontal/pre-SMA* |
| Rhythm & Reanalysis | L     | 664  | -50.2 | 13.3 | 16.9 | IFG (pars Opercularis)      | -50 | 14  | 16 | IFG (pars Opercularis)      |
|                     | R     | 136  | 32.7  | 22.6 | 1.7  | Insula                      | 32  | 22  | 2  | None/Insula*                |
|                     | L     | 48   | -37.3 | -53  | 41.7 | IPL                         | -36 | -52 | 42 | IPL                         |
|                     | L     | 24   | -3.3  | 4    | 63.4 | Post.-Med. Frontal/pre-SMA* | -4  | 4   | 64 | Post.-Med. Frontal/pre-SMA* |
|                     | L     | 8    | 0     | 8    | 52   | Post.-Med. Frontal/pre-SMA* | 0   | 8   | 52 | Post.-Med. Frontal/pre-SMA* |
|                     | L     | 8    | -4    | 8    | 54   | Post.-Med. Frontal/pre-SMA* | -4  | 8   | 54 | Post.-Med. Frontal/pre-SMA* |
|                     | L     | 8    | -4    | 6    | 56   | Post.-Med. Frontal/pre-SMA* | -4  | 6   | 56 | Post.-Med. Frontal/pre-SMA* |

**Table 7: Overlapping clusters between rhythm and each syntax analysis.** WC: the weighted center of the cluster; EV: the extrema value; IFG: inferior frontal gyrus; Post.-Med. Frontal: posterior-medial frontal; SMA: supplementary motor area; IPL: intraparietal lobule. Asterisk indicates that the second anatomical label was assigned manually by the authors.

## 4. Discussion

The primary goal of the present article is to provide a comprehensive overview of the brain-wide network that is recruited by both musical rhythm and linguistic syntax. To this end, we exhaustively searched for neuroimaging studies in these two domains. Out of an initial 2,504 neuroimaging studies considered by the present analysis, we found 24 rhythm experiments pertaining to rhythm, beat, and meter as well as 50 syntax experiments pertaining to merge, movement, and reanalysis that qualified for a series of ALE meta-analyses. Rhythm mostly recruited symmetrical clusters in bilateral cortical and subcortical areas including the IFG, putamen, SMA, STG, insula, and IPL. By contrast, syntax predominantly engaged a left-lateralized network including the IFG, PMC, STG, insula, and IPL. Overlap between rhythm and syntax was found in the left IFG, left supplementary motor area, and bilateral insula. Additional intersections between rhythm and each syntax process yielded clusters within a similar part of the left IFG (pars Opercularis), but only movement and reanalysis recruited motor regions such as the SMA. In what follows, we discuss how the current findings can shed light on the theoretical framework and behavioral evidence suggesting connections between music and language.

### 4.1 *Overlap between Rhythm and Syntax*

There is a growing body of behavioral evidence indicating a substantial influence of rhythmic and timing context on syntactic processing. For example, in Jung et al (2015, 2016), participants read garden path sentences that were presented word-by-word in an isochronous fashion while listening to chord sequences. When the critical disambiguating word was presented off-beat compared to the rest of the sentence, participants had a more difficult time parsing sentences (Jung, 2016; Jung et al., 2015). Conversely, it has been shown with various children populations that coherent rhythmic and metric cues facilitate identification of morphosyntactically correct and incorrect sentences. These populations include children with speech and language deficits such as dyslexia (Przybylski et al., 2013; Schmidt-Kassow and Kotz, 2008b, 2008a), SLI (Bedoin et al., 2016), and cochlear implants (Bedoin et al., 2017), as well as typically-developing children (Bedoin et al., 2017, 2016; Przybylski et al., 2013). Moreover, priming with rhythmic sequences containing easy-to-extract meter facilitated language comprehension compared to priming with rhythms that induced a complex meter (Przybylski et al., 2013). This facilitation effect does not appear to transfer to math and visuospatial tasks (Chern et al., 2018). Beyond these examples of interference and facilitation, Bedoin and colleagues (2017) demonstrated a transfer of training between

the two domains by developing a rhythm training program to restore syntax comprehension abilities for congenitally deaf children with cochlear implants.

These behavioral connections between rhythm and syntax have been supported by neuroimaging data, mostly from electroencephalography (EEG; Kotz and Gunter, 2015; Roncaglia-Denissen et al., 2013). For example, German listeners understood syntactically ambiguous sentences more accurately when sentences were spoken with a regular versus irregular meter (Roncaglia-Denissen et al., 2013). The behavioral facilitation was accompanied by reduction of the P600 component—a hallmark of syntactic reanalysis (Frisch et al., 2002)—suggesting an interaction between meter and syntax processing. Relatedly, a case study using EEG with a Parkinsonian patient showed that the P600 component was restored priming with a regular beat (i.e. marching music; Kotz and Gunter, 2015). Although the exact source of this P600 remains elusive, the present study suggests that the left IFG, SMA, and bilateral insula may be candidate loci whose activities can be modulated by external beat priming during syntactic processing. That is, these areas may incorporate rhythmic (temporal) context during moment-to-moment analysis of syntactic structures. Such neural sensitivity to timing may be sharpened through music training, which may confer benefits to language (Patel, 2014) by enhancing temporal processing and/or predictive coding in these regions.

Alternatively, could the observed functional overlaps between rhythm and syntax reflect generic cognitive processes that are recruited by any type of task involving attention, decision-making, and working memory? Indeed, most of these overlapping clusters are parts of the so-called “extrinsic mode network (EMN)” that are active in a non-specific task-generic manner (Hugdahl et al., 2015). However, these frontal loci have been implicated in numerous neuroimaging studies of music and language; there is a firm consensus that these regions are integral parts of these respective networks (Friederici, 2018; Kunert et al., 2015; Nguyen et al., 2018). Because the EMN includes fronto-parietal-temporal cortices, it is difficult to completely rule out a possibility that some of the overlapping clusters reported here may have appeared due to generic cognitive processes that both rhythm and syntax entail. For this reason, we have taken our due diligence to guard against reports of non-specific ALE activation. For example, we included experiments contrasting rhythmic and syntactic tasks versus an active baseline (e.g. meter tapping versus beat tapping, syntactically difficult versus easy sentences) instead of resting baselines. Furthermore, we applied a stringent statistical threshold ( $P < 0.001$  voxel-wise in combination with  $P < 0.05$  family-wise error cluster size correction) in the resulting rhythm and syntax map.



Nevertheless, we acknowledge that some of the overlapping frontal clusters may reflect non-specific cognitive resources recruited by both domains.

Conversely, the fact that the same voxels are activated by rhythm and syntax does not necessarily indicate that the same neurons are involved in the two tasks, as there are hundreds of thousands of neurons and glia within a voxel (Koelsch, 2011). This is an intrinsically challenging problem that current state-of-the-art neuroimaging research still faces. Within the overlapping cluster, it is plausible that some neurons are exclusively responding to musical rhythm or linguistic syntax processing, but not both. Future studies with higher resolution neuroimaging as well as focal stimulation using advanced transcranial magnetic stimulation) or electrocorticography will allow researchers to better identify at a finer-grained scale the neuronal populations that are tuned to the common or distinct aspects of rhythm and syntax.

#### *4.2 Temporal Hierarchy Processing*

An important characteristic of music and language is the hierarchical organization of serial temporal information (Fadiga et al., 2009; Fiebach and Schubotz, 2006; Fitch and Martins, 2014; Jackendoff, 2009; Jeon, 2014; Lashley, 1951). For example, along the hierarchy of rhythm structure, the lowest unit consists of the onsets of tones (i.e. rhythm), from which a pulse or beat is extracted, which in turn gives rise to meter (Fitch, 2013; Lerdahl and Jackendoff, 1983; Vuust and Witek, 2014; Zatorre and Zarate, 2012). Similarly, along the hierarchy of grammar, word roots can join affixes to form new roots (e.g. *establish*; *establishment*; *disestablishment*), giving rise to differences in word meanings (Jackendoff, 2009). A set of words then form syntactic phrases that ultimately are the constituents of a whole sentence. Many studies examining temporal hierarchy in syntax have implicated the left IFG in both the music and language domains (for a review, see Fitch and Martins, 2014). For example, the left IFG was shown to be responsive to violations of linguistic and musical syntax (Fedorenko et al., 2009; Koelsch et al., 2005b; Slevc et al., 2009; Sun et al., 2018). In the present study, we found significant overlap between musical rhythm and linguistic syntax, which is in line with these previous findings.

Importantly, temporal hierarchies can also account for action sequencing in the motor domain (Fadiga et al., 2009; Fiebach and Schubotz, 2006; Fitch and Martins, 2014; Jackendoff, 2009; Jeon, 2014; Lashley, 1951; Pulvermüller, 2014); according to Jackendoff's model (Jackendoff, 2007), complex actions can be broken down into three components: preparation, head, and coda. The head forms the core of an action and contains steps to execute the main goal. Preparation, however, consists of any steps that need to be completed before execution of the head can start. Lastly, codas are any series

of steps required to return the system to normalcy. Such action sequences are mainly mediated by frontal motor circuitries including the left IFG, PMC, and SMA (Clerget et al., 2009; Koechlin and Jubault, 2006). These frontal motoric processors exhibited overlaps between rhythm and syntax in the present study, suggesting that they are also at play in analyzing the temporal hierarchies for musical rhythm and linguistic syntax. Relatedly, early left anterior negativities (ELAN) and parietal P600 components were observed when canonical structures were violated in action and language (Maffongelli et al., 2015). More recently, Casado et al. (2018) reported interaction of both ELAN and P600 between syntax and complex motor processes. Although the overlapping clusters were found mostly within the left hemisphere in the present ALE study, some studies have implicated either the bilateral or the right frontal cortex for music (Cheung et al., 2018; Farbood et al., 2015; Koelsch et al., 2013, 2005a; Maess et al., 2001), language (Bahlmann et al., 2008), and action (Koechlin and Jubault, 2006; Schubotz and Cramon, 2004). For example, a recent fMRI study created stimuli that violated temporal structure at multiple levels of organization by scrambling a famous piano concerto. While a variety of auditory areas were activated in response to the scrambled concerto, the right IFG was solely active when professional pianists listened to the unscrambled piece (Farbood et al., 2015). Together, the frontal motor network appears to be involved in the dynamics of temporal structure pervasive in music, language, and action.

#### *4.3 Predictive Coding*

Both rhythm and syntax entail predictive coding in order to more efficiently process upcoming events (Koelsch et al., 2019; Kuperberg and Jaeger, 2016; Rohrmeier and Koelsch, 2012; Staub, 2015; van der Steen et al., 2013; Vuust and Witek, 2014). For example, in music, listeners have a tendency to tap before the actual beat (Repp, 2005; Repp and Su, 2013), indicating that listeners are actively predicting the next beat. Indeed, the sensation of syncopation is achieved by disrupting active predictions (Vuust and Witek, 2014), a phenomenon which is often used by composers on purpose. Linguistic syntax also leverages prediction during comprehension. Syntactic surprisal paradigms are particularly based upon estimating how likely a next word fits the canonical syntactic structure (Hale, 2001; Levy, 2008). While such paradigms have been used in previous neuroimaging studies, there were not enough studies that qualified to be included in the present ALE analysis. However, predictive coding can be considered in the data obtained from syntactic merge, movement, and reanalysis. For merge, it is more likely for a determinant to be followed by a noun (e.g. {the} + {car}) than it is to be followed by a word that typically functions as a verb (e.g. {the} + {jump}). For

movement, sentences beginning with ‘Wh-’ should give rise to prediction. Lastly, as an example of reanalysis, garden pathing occurs when predictions are violated.

What neural substrates are responsible for predictive coding in rhythm and syntax? Past neuroimaging studies have highlighted the putamen, SMA (Grahn and Rowe, 2013) and PMC (Jantzen et al., 2007) in tasks involving prediction for rhythm sequences. Similarly, words with high syntactic surprisal cause a response in the right putamen, bilateral IFG, and insula (Henderson et al., 2016). Together, these results demonstrate how fronto-striatal networks play a crucial role in predicting structure in musical rhythm and linguistic syntax (Kotz et al., 2009). Such observations in music have led to the Action Simulation for Auditory Processing hypothesis (Iversen et al., 2009; Iversen and Balasubramaniam, 2016; Patel and Iversen, 2014) proposing that action processing is recruited during predictive coding of music and language.

#### *4.4 Overlap in Merge, Movement, and Reanalysis*

Although our primary goal was to identify overlapping clusters between musical rhythm and linguistic syntax using ALE data, we attempted to make additional comparisons between different types of syntactic processes by taking advantage of the large number of neuroimaging experiments on merge, movement, and reanalysis. Of course, there are many other types of syntactic operations, such as surprisal (Henderson et al., 2016), and morphosyntactic transformations (Sahin et al., 2006). Unfortunately, too few experiments in these domains qualified for the ALE analysis. However, this is an important avenue to be explored by future ALE studies when more neuroimaging studies of syntactic surprisal have accumulated.

The extra comparisons within syntax yielded a single tripartite cluster only in the pars Opercularis, one of the constituting parts of Broca’s area. Emerging evidence garnered from neuroimaging and neurophysiology studies have indicated functional (Sahin et al., 2009) and anatomical segregation between the pars Opercularis and pars Triangularis—the two sub-units of Broca’s area (Amunts et al., 2010). Importantly, these two adjacent areas have been hypothesized to handle different types of language operations; the pars Triangularis has been implicated in the “semantic combinatorics” (Friederici, 2018) required in sentence comprehension, as well as lexical decision tasks (Heim et al., 2005). The pars Opercularis has been implicated in general sequencing and hierarchical processing in linguistic syntax (Friederici, 2018, 2002), which may explain the overlap among the three syntactic processes observed in the current study.

Beyond the left IFG, movement and reanalysis engaged the PMC and SMA. While both regions have been implicated in auditory and language processing (Hertrich et al., 2016; Lima et al., 2016), their participation in syntax has received less attention

compared to the IFG and STG. Our data revealed that involvement of the PMC and SMA depends on the type of syntactic process being studied. In order to resolve violations of prediction or to rapidly process grammatical rules, these motor areas may require more coordination with the left IFG and PMC/SMA via the aslant tract (Dick et al., 2014; Vassal et al., 2014). Future studies are warranted to elucidate the neuroanatomical connection between these frontal areas during various types of syntactic processing.

## 5. Conclusion

Over the past few decades, increasing evidence has been garnered regarding the behavioral connections between music and language in general, as well as between rhythm and syntax in particular (Gordon et al., 2015a). The present ALE meta-analysis attempted to lay the groundwork demonstrating detailed neuroanatomical overlap between musical rhythm and linguistic syntax. Our findings well speak to hierarchical processing (Fitch and Martins, 2014), temporal prediction (Vuust and Witek, 2014), and sequencing (Kotz et al., 2009); processes that are mediated by the frontal motor circuitries including left IFG, SMA, and bilateral insula.

## Declarations of interest

None.

## Conflicts of interest

The authors report no conflicts of interest.

## Acknowledgements

Thanks to Simon Eickhoff for answering methodological questions about ALE and GingerALE software. We thank members in the SLAM lab for their helpful comments on the earlier version of the manuscript. This study was funded by Center for Brain Injury, part of The Ohio State University Discovery Initiative and the neuroimaging pilot grant from the College of Arts and Sciences at OSU.

## References

Amunts, K., Lenzen, M., Friederici, A.D., Schleicher, A., Morosan, P., Palomero-Gallagher, N., Zilles, K., 2010. Broca's Region: Novel Organizational Principles and Multiple Receptor Mapping. *PLOS Biology* 8, e1000489. <https://doi.org/10.1371/journal.pbio.1000489>

- Araneda, R., Renier, L., Ebner-Karestinos, D., Dricot, L., De Volder, A.G., 2017. Hearing, feeling or seeing a beat recruits a supramodal network in the auditory dorsal stream. *Eur J Neurosci* 45, 1439–1450. <https://doi.org/10.1111/ejn.13349>
- Bahlmann, J., Schubotz, R.I., Friederici, A.D., 2008. Hierarchical artificial grammar processing engages Broca's area. *NeuroImage* 42, 525–534. <https://doi.org/10.1016/j.neuroimage.2008.04.249>
- Bedoin, N., Besombes, A.-M., Escande, E., Dumont, A., Lalitte, P., Tillmann, B., 2017. Boosting syntax training with temporally regular musical primes in children with cochlear implants. *Annals of Physical and Rehabilitation Medicine*. <https://doi.org/10.1016/j.rehab.2017.03.004>
- Bedoin, N., Brisseau, L., Molinier, P., Roch, D., Tillmann, B., 2016. Temporally Regular Musical Primes Facilitate Subsequent Syntax Processing in Children with Specific Language Impairment. *Front Neurosci* 10. <https://doi.org/10.3389/fnins.2016.00245>
- Bengtsson, S.L., Ehrsson, H.H., Forssberg, H., Ullén, F., 2005. Effector-independent voluntary timing: behavioural and neuroimaging evidence. *European Journal of Neuroscience* 22, 3255–3265. <https://doi.org/10.1111/j.1460-9568.2005.04517.x>
- Bengtsson, S.L., Ehrsson, H.H., Forssberg, H., Ullén, F., 2004. Dissociating brain regions controlling the temporal and ordinal structure of learned movement sequences. *European Journal of Neuroscience* 19, 2591–2602. <https://doi.org/10.1111/j.0953-816X.2004.03269.x>
- Bengtsson, S.L., Ullén, F., Henrik Ehrsson, H., Hashimoto, T., Kito, T., Naito, E., Forssberg, H., Sadato, N., 2009. Listening to rhythms activates motor and premotor cortices. *Cortex, Special Issue on "The Rhythmic Brain"* 45, 62–71. <https://doi.org/10.1016/j.cortex.2008.07.002>
- Bhide, A., Power, A., Goswami, U., 2013. A Rhythmic Musical Intervention for Poor Readers: A Comparison of Efficacy With a Letter-Based Intervention. *Mind, Brain, and Education* 7, 113–123. <https://doi.org/10.1111/mbe.12016>
- Bolger, D., Coull, J.T., Schön, D., 2014. Metrical Rhythm Implicitly Orients Attention in Time as Indexed by Improved Target Detection and Left Inferior Parietal Activation. *Journal of Cognitive Neuroscience* 26, 644–605. [https://doi.org/10.1162/jocn\\_a\\_00511](https://doi.org/10.1162/jocn_a_00511)
- Bonhage, C.E., Fiebach, C.J., Bahlmann, J., Mueller, J.L., 2014. Brain Signature of Working Memory for Sentence Structure: Enriched Encoding and Facilitated Maintenance. *Journal of Cognitive Neuroscience* 26, 1654–1671. [https://doi.org/10.1162/jocn\\_a\\_00566](https://doi.org/10.1162/jocn_a_00566)
- Bornkessel-Schlesewsky, I., Schlesewsky, M., Cramon, D.Y. von, 2009. Word order and Broca's region: Evidence for a supra-syntactic perspective. *Brain and Language* 111, 125–139. <https://doi.org/10.1016/j.bandl.2009.09.004>

- Bozic, M., Fonteneau, E., Su, L., Marslen-Wilson, W.D., 2015. Grammatical analysis as a distributed neurobiological function. *Human Brain Mapping* 36, 1190–1201. <https://doi.org/10.1002/hbm.22696>
- Bulut, T., Hung, Y.-H., Tzeng, O., Wu, D.H., 2017. Neural correlates of processing sentences and compound words in Chinese. *PLOS ONE* 12, e0188526. <https://doi.org/10.1371/journal.pone.0188526>
- Caplan, D., Chen, E., Waters, G., 2007. Task-dependent and task-independent neurovascular responses to syntactic processing. *Cortex* 44, 257–275. <https://doi.org/10.1016/j.cortex.2006.06.005>
- Caplan, D., Stanczak, L., Waters, G., 2008. Syntactic and Thematic Constraint Effects on Blood Oxygenation Level Dependent Signal Correlates of Comprehension of Relative Clauses. *Journal of Cognitive Neuroscience* 20, 643–656. <https://doi.org/10.1162/jocn.2008.20044>
- Caplan, D., Waters, G.S., 1999. Verbal working memory and sentence comprehension. *Behavioral and Brain Sciences* 22. <https://doi.org/10.1017/S0140525X99001788>
- Casado, P., Martín-Loeches, M., León, I., Hernández-Gutiérrez, D., Espuny, J., Muñoz, F., Jiménez-Ortega, L., Fondevila, S., de Vega, M., 2018. When syntax meets action: Brain potential evidence of overlapping between language and motor sequencing. *Cortex, Embodiment disrupted: Tapping into movement disorders through syntax and action semantics* 100, 40–51. <https://doi.org/10.1016/j.cortex.2017.11.002>
- Chan, S., Ryan, L., Bever, T.G., 2013. Role of the striatum in language: Syntactic and conceptual sequencing. *Brain and Language* 125, 283–294. <https://doi.org/10.1016/j.bandl.2011.11.005>
- Chein, J.M., Fissell, K., Jacobs, S., Fiez, J.A., 2002. Functional heterogeneity within Broca's area during verbal working memory. *Physiology & Behavior* 77, 635–639. [https://doi.org/10.1016/S0031-9384\(02\)00899-5](https://doi.org/10.1016/S0031-9384(02)00899-5)
- Chen, E., West, W.C., Waters, G., Caplan, D., 2006. Determinants of Bold Signal Correlates of Processing Object-Extracted Relative Clauses. *Cortex* 42, 591–604. [https://doi.org/10.1016/S0010-9452\(08\)70397-6](https://doi.org/10.1016/S0010-9452(08)70397-6)
- Chen, J.L., Penhune, V.B., Zatorre, R.J., 2007. Moving on Time: Brain Network for Auditory-Motor Synchronization is Modulated by Rhythm Complexity and Musical Training. *Journal of Cognitive Neuroscience* 20, 226–239. <https://doi.org/10.1162/jocn.2008.20018>
- Chen, J.L., Zatorre, R.J., Penhune, V.B., 2006. Interactions between auditory and dorsal premotor cortex during synchronization to musical rhythms. *NeuroImage* 32, 1771–1781. <https://doi.org/10.1016/j.neuroimage.2006.04.207>
- Chern, A., Tillmann, B., Vaughan, C., Gordon, R.L., 2018. New evidence of a rhythmic priming effect that enhances grammaticality judgments in children. *Journal of*

- Experimental Child Psychology 173, 371–379.  
<https://doi.org/10.1016/j.jecp.2018.04.007>
- Cheung, V.K.M., Meyer, L., Friederici, A.D., Koelsch, S., 2018. The right inferior frontal gyrus processes nested non-local dependencies in music. *Scientific Reports* 8, 3822. <https://doi.org/10.1038/s41598-018-22144-9>
- Chomsky, N., 1995. *The minimalist program*, Current studies in linguistics. The MIT Press, Cambridge, Mass.
- Clerget, E., Winderickx, A., Fadiga, L., Olivier, E., 2009. Role of Broca's area in encoding sequential human actions: a virtual lesion study. *NeuroReport* 20, 1496.  
<https://doi.org/10.1097/WNR.0b013e3283329be8>
- Cooke, A., Zurif, E.B., DeVita, C., Alsop, D., Koenig, P., Detre, J., Gee, J., Pinãngo, M., Balogh, J., Grossman, M., 2001. Neural basis for sentence comprehension: Grammatical and short-term memory components. *Hum. Brain Mapp.* 15, 80–94.  
<https://doi.org/10.1002/hbm.10006>
- Corriveau, K.H., Goswami, U., 2009. Rhythmic motor entrainment in children with speech and language impairments: Tapping to the beat. *Cortex*, Special Issue on "The Rhythmic Brain" 45, 119–130. <https://doi.org/10.1016/j.cortex.2007.09.008>
- Danielsen, A., Otnæss, M.K., Jensen, J., Williams, S.C.R., Østberg, B.C., 2014. Investigating repetition and change in musical rhythm by functional MRI. *Neuroscience* 275, 469–476. <https://doi.org/10.1016/j.neuroscience.2014.06.029>
- Dick, A.S., Bernal, B., Tremblay, P., 2014. The Language Connectome: New Pathways, New Concepts. *Neuroscientist* 20, 453–467.  
<https://doi.org/10.1177/1073858413513502>
- Eickhoff, S.B., Bzdok, D., Laird, A.R., Kurth, F., Fox, P.T., 2012. Activation likelihood estimation meta-analysis revisited. *NeuroImage* 59, 2349–2361.  
<https://doi.org/10.1016/j.neuroimage.2011.09.017>
- Eickhoff, S.B., Heim, S., Zilles, K., Amunts, K., 2006. Testing anatomically specified hypotheses in functional imaging using cytoarchitectonic maps. *NeuroImage* 32, 570–582. <https://doi.org/10.1016/j.neuroimage.2006.04.204>
- Eickhoff, S.B., Laird, A.R., Grefkes, C., Wang, L.E., Zilles, K., Fox, P.T., 2009. Coordinate-based activation likelihood estimation meta-analysis of neuroimaging data: A random-effects approach based on empirical estimates of spatial uncertainty. *Hum. Brain Mapp.* 30, 2907–2926.  
<https://doi.org/10.1002/hbm.20718>
- Eickhoff, S.B., Nichols, T.E., Laird, A.R., Hoffstaedter, F., Amunts, K., Fox, P.T., Bzdok, D., Eickhoff, C.R., 2016. Behavior, sensitivity, and power of activation likelihood estimation characterized by massive empirical simulation. *NeuroImage* 137, 70–85. <https://doi.org/10.1016/j.neuroimage.2016.04.072>
- Eickhoff, S.B., Paus, T., Caspers, S., Grosbras, M.-H., Evans, A.C., Zilles, K., Amunts, K., 2007. Assignment of functional activations to probabilistic cytoarchitectonic areas

- revisited. *NeuroImage* 36, 511–521.  
<https://doi.org/10.1016/j.neuroimage.2007.03.060>
- Eickhoff, S.B., Stephan, K.E., Mohlberg, H., Grefkes, C., Fink, G.R., Amunts, K., Zilles, K., 2005. A new SPM toolbox for combining probabilistic cytoarchitectonic maps and functional imaging data. *NeuroImage* 25, 1325–1335.  
<https://doi.org/10.1016/j.neuroimage.2004.12.034>
- Fadiga, L., Craighero, L., D’Ausilio, A., 2009. Broca’s Area in Language, Action, and Music. *Annals of the New York Academy of Sciences* 1169, 448–458.  
<https://doi.org/10.1111/j.1749-6632.2009.04582.x>
- Farbood, M.M., Heeger, D.J., Marcus, G., Hasson, U., Lerner, Y., 2015. The neural processing of hierarchical structure in music and speech at different timescales. *Front. Neurosci.* 9. <https://doi.org/10.3389/fnins.2015.00157>
- Fedorenko, E., Patel, A., Casasanto, D., Winawer, J., Gibson, E., 2009. Structural integration in language and music: Evidence for a shared system. *Memory & Cognition* 37, 1–9. <https://doi.org/10.3758/MC.37.1.1>
- Feng, S., Legault, J., Yang, L., Zhu, J., Shao, K., Yang, Y., 2015. Differences in grammatical processing strategies for active and passive sentences: An fMRI study. *Journal of Neurolinguistics, Language, Brain, and Gene: The Chinese Context* 33, 104–117. <https://doi.org/10.1016/j.jneuroling.2014.09.002>
- Fernald, A., McRoberts, G., 1996. Prosodic bootstrapping: A critical analysis of the argument and the evidence. *Signal to syntax: Bootstrapping from speech to grammar in early acquisition* 365–388.
- Fiebach, C.J., Schubotz, R.I., 2006. Dynamic Anticipatory Processing of Hierarchical Sequential Events: a Common Role for Broca’s Area and Ventral Premotor Cortex Across Domains? *Cortex* 42, 499–502. [https://doi.org/10.1016/S0010-9452\(08\)70386-1](https://doi.org/10.1016/S0010-9452(08)70386-1)
- Fitch, W.T., 2013. Rhythmic cognition in humans and animals: distinguishing meter and pulse perception. *Front. Syst. Neurosci.* 7.  
<https://doi.org/10.3389/fnsys.2013.00068>
- Fitch, W.T., Martins, M.D., 2014. Hierarchical processing in music, language, and action: Lashley revisited. *Annals of the New York Academy of Sciences* 1316, 87–104.  
<https://doi.org/10.1111/nyas.12406>
- Flaugnacco, E., Lopez, L., Terribili, C., Montico, M., Zoia, S., Schön, D., 2015. Music Training Increases Phonological Awareness and Reading Skills in Developmental Dyslexia: A Randomized Control Trial. *PLOS ONE* 10, e0138715.  
<https://doi.org/10.1371/journal.pone.0138715>
- Foster, N.E.V., Zatorre, R.J., 2010. A Role for the Intraparietal Sulcus in Transforming Musical Pitch Information. *Cereb Cortex* 20, 1350–1359.  
<https://doi.org/10.1093/cercor/bhp199>



- Friederici, A.D., 2018. The neural basis for human syntax: Broca's area and beyond. *Current Opinion in Behavioral Sciences, The Evolution of Language* 21, 88–92. <https://doi.org/10.1016/j.cobeha.2018.03.004>
- Friederici, A.D., 2002. Towards a neural basis of auditory sentence processing. *Trends in Cognitive Sciences* 6, 78–84. [https://doi.org/10.1016/S1364-6613\(00\)01839-8](https://doi.org/10.1016/S1364-6613(00)01839-8)
- Frisch, S., Schlesewsky, M., Saddy, D., Alpermann, A., 2002. The P600 as an indicator of syntactic ambiguity. *Cognition* 85, B83–B92. [https://doi.org/10.1016/S0010-0277\(02\)00126-9](https://doi.org/10.1016/S0010-0277(02)00126-9)
- Geiser, E., Notter, M., Gabrieli, J.D.E., 2012. A Corticostriatal Neural System Enhances Auditory Perception through Temporal Context Processing. *J. Neurosci.* 32, 6177–6182. <https://doi.org/10.1523/JNEUROSCI.5153-11.2012>
- Geiser, E., Walker, K.M.M., Bendor, D., 2014. Global timing: a conceptual framework to investigate the neural basis of rhythm perception in humans and non-human species. *Front. Psychol.* 5. <https://doi.org/10.3389/fpsyg.2014.00159>
- Gordon, R.L., Jacobs, M.S., Schuele, C.M., McAuley, J.D., 2015a. Perspectives on the rhythm–grammar link and its implications for typical and atypical language development. *Ann N Y Acad Sci* 1337, 16–25. <https://doi.org/10.1111/nyas.12683>
- Gordon, R.L., Shivers, C.M., Wieland, E.A., Kotz, S.A., Yoder, P.J., Devin McAuley, J., 2015b. Musical rhythm discrimination explains individual differences in grammar skills in children. *Dev Sci* 18, 635–644. <https://doi.org/10.1111/desc.12230>
- Gorgolewski, K.J., Varoquaux, G., Rivera, G., Schwarz, Y., Ghosh, S.S., Maumet, C., Sochat, V.V., Nichols, T.E., Poldrack, R.A., Poline, J.-B., Yarkoni, T., Margulies, D.S., 2015. NeuroVault.org: a web-based repository for collecting and sharing unthresholded statistical maps of the human brain. *Front. Neuroinform.* 9. <https://doi.org/10.3389/fninf.2015.00008>
- Goswami, U., 2011. A temporal sampling framework for developmental dyslexia. *Trends in Cognitive Sciences* 15, 3–10. <https://doi.org/10.1016/j.tics.2010.10.001>
- Goswami, U., Huss, M., Mead, N., Fosker, T., Verney, J.P., 2013. Perception of patterns of musical beat distribution in phonological developmental dyslexia: Significant longitudinal relations with word reading and reading comprehension. *Cortex* 49, 1363–1376. <https://doi.org/10.1016/j.cortex.2012.05.005>
- Goucha, T., Friederici, A.D., 2015. The language skeleton after dissecting meaning: A functional segregation within Broca's Area. *NeuroImage* 114, 294–302. <https://doi.org/10.1016/j.neuroimage.2015.04.011>
- Grahn, J.A., 2012. Neural Mechanisms of Rhythm Perception: Current Findings and Future Perspectives. *Topics in Cognitive Science* 4, 585–606. <https://doi.org/10.1111/j.1756-8765.2012.01213.x>

- Grahn, J.A., Rowe, J.B., 2013. Finding and Feeling the Musical Beat: Striatal Dissociations between Detection and Prediction of Regularity. *Cereb Cortex* 23, 913–921. <https://doi.org/10.1093/cercor/bhs083>
- Grodzinsky, Y., Santi, A., 2008. The battle for Broca's region. *Trends in Cognitive Sciences* 12, 474–480. <https://doi.org/10.1016/j.tics.2008.09.001>
- Hale, J., 2001. A Probabilistic Earley Parser As a Psycholinguistic Model, in: *Proceedings of the Second Meeting of the North American Chapter of the Association for Computational Linguistics on Language Technologies, NAACL '01*. Association for Computational Linguistics, Stroudsburg, PA, USA, pp. 1–8. <https://doi.org/10.3115/1073336.1073357>
- Heim, S., Alter, K., Ischebeck, A.K., Amunts, K., Eickhoff, S.B., Mohlberg, H., Zilles, K., von Cramon, D.Y., Friederici, A.D., 2005. The role of the left Brodmann's areas 44 and 45 in reading words and pseudowords. *Cognitive Brain Research* 25, 982–993. <https://doi.org/10.1016/j.cogbrainres.2005.09.022>
- Henderson, J.M., Choi, W., Lowder, M.W., Ferreira, F., 2016. Language structure in the brain: A fixation-related fMRI study of syntactic surprisal in reading. *NeuroImage* 132, 293–300. <https://doi.org/10.1016/j.neuroimage.2016.02.050>
- Hertrich, I., Dietrich, S., Ackermann, H., 2016. The role of the supplementary motor area for speech and language processing. *Neuroscience & Biobehavioral Reviews* 68, 602–610. <https://doi.org/10.1016/j.neubiorev.2016.06.030>
- Hillen, R., Günther, T., Kohlen, C., Eckers, C., van Ermingen-Marbach, M., Sass, K., Scharke, W., Vollmar, J., Radach, R., Heim, S., 2013. Identifying brain systems for gaze orienting during reading: fMRI investigation of the Landolt paradigm. *Front. Hum. Neurosci.* 7. <https://doi.org/10.3389/fnhum.2013.00384>
- Hsu, N.S., Jaeggi, S.M., Novick, J.M., 2017. A common neural hub resolves syntactic and non-syntactic conflict through cooperation with task-specific networks. *Brain and Language* 166, 63–77. <https://doi.org/10.1016/j.bandl.2016.12.006>
- Hugdahl, K., Raichle, M.E., Mitra, A., Specht, K., 2015. On the existence of a generalized non-specific task-dependent network. *Front Hum Neurosci* 9. <https://doi.org/10.3389/fnhum.2015.00430>
- Hung, Y.-H., Pallier, C., Dehaene, S., Lin, Y.-C., Chang, A., Tzeng, O.J.-L., Wu, D.H., 2015. Neural correlates of merging number words. *NeuroImage* 122, 33–43. <https://doi.org/10.1016/j.neuroimage.2015.07.045>
- Huss, M., Verney, J.P., Fosker, T., Mead, N., Goswami, U., 2011. Music, rhythm, rise time perception and developmental dyslexia: Perception of musical meter predicts reading and phonology. *Cortex* 47, 674–689. <https://doi.org/10.1016/j.cortex.2010.07.010>
- Iversen, J.R., Balasubramaniam, R., 2016. Synchronization and temporal processing. *Current Opinion in Behavioral Sciences, Time in perception and action* 8, 175–180. <https://doi.org/10.1016/j.cobeha.2016.02.027>

- Iversen, J.R., Repp, B.H., Patel, A.D., 2009. Top-Down Control of Rhythm Perception Modulates Early Auditory Responses. *Annals of the New York Academy of Sciences* 1169, 58–73. <https://doi.org/10.1111/j.1749-6632.2009.04579.x>
- Jackendoff, R., 2009. Parallels and nonparallels between language and music. *Music Perception: An Interdisciplinary Journal* 26, 195–204.
- Jackendoff, R., 2007. *Language, Consciousness, Culture: Essays on Mental Structure*. MIT Press.
- Jantzen, K.J., Oullier, O., Marshall, M., Steinberg, F.L., Kelso, J.A.S., 2007. A parametric fMRI investigation of context effects in sensorimotor timing and coordination. *Neuropsychologia* 45, 673–684. <https://doi.org/10.1016/j.neuropsychologia.2006.07.020>
- Jeon, H.-A., 2014. Hierarchical processing in the prefrontal cortex in a variety of cognitive domains. *Front. Syst. Neurosci.* 8. <https://doi.org/10.3389/fnsys.2014.00223>
- Jung, H., 2016. *The Electrophysiological Correlates of Rhythm and Syntax in Music and Language*. Wesleyan University, Middletown, Connecticut.
- Jung, H., Sontag, S., Park, Y.S., Loui, P., 2015. Rhythmic Effects of Syntax Processing in Music and Language. *Front. Psychol.* 6. <https://doi.org/10.3389/fpsyg.2015.01762>
- Jungblut, M., Huber, W., Pustelniak, M., Schnitker, R., 2012. The impact of rhythm complexity on brain activation during simple singing: An event-related fMRI study. *Restorative Neurology and Neuroscience* 30, 39–53. <https://doi.org/10.3233/RNN-2011-0619>
- Kinno, R., Kawamura, M., Shioda, S., Sakai, K.L., 2008. Neural correlates of noncanonical syntactic processing revealed by a picture-sentence matching task. *Hum. Brain Mapp.* 29, 1015–1027. <https://doi.org/10.1002/hbm.20441>
- Koechlin, E., Jubault, T., 2006. Broca's Area and the Hierarchical Organization of Human Behavior. *Neuron* 50, 963–974. <https://doi.org/10.1016/j.neuron.2006.05.017>
- Koelsch, S., 2011. Toward a Neural Basis of Music Perception – A Review and Updated Model. *Front. Psychol.* 2. <https://doi.org/10.3389/fpsyg.2011.00110>
- Koelsch, S., Fritz, T., Schulze, K., Alsop, D., Schlaug, G., 2005a. Adults and children processing music: An fMRI study. *NeuroImage* 25, 1068–1076. <https://doi.org/10.1016/j.neuroimage.2004.12.050>
- Koelsch, S., Gunter, T.C., Wittfoth, M., Sammler, D., 2005b. Interaction between Syntax Processing in Language and in Music: An ERP Study. *Journal of Cognitive Neuroscience* 17, 1565–1577. <https://doi.org/10.1162/089892905774597290>
- Koelsch, S., Rohrmeier, M., Torrecuso, R., Jentschke, S., 2013. Processing of hierarchical syntactic structure in music. *PNAS* 110, 15443–15448. <https://doi.org/10.1073/pnas.1300272110>

- Koelsch, S., Vuust, P., Friston, K., 2019. Predictive Processes and the Peculiar Case of Music. *Trends Cogn. Sci. (Regul. Ed.)* 23, 63–77.  
<https://doi.org/10.1016/j.tics.2018.10.006>
- Koizumi, M., Kim, J., 2016. Greater Left Inferior Frontal Activation for SVO than VOS during Sentence Comprehension in Kaqchikel. *Front. Psychol.* 7.  
<https://doi.org/10.3389/fpsyg.2016.01541>
- Konoike, N., Kotozaki, Y., Jeong, H., Miyazaki, A., Sakaki, K., Shinada, T., Sugiura, M., Kawashima, R., Nakamura, K., 2015. Temporal and Motor Representation of Rhythm in Fronto-Parietal Cortical Areas: An fMRI Study. *PLOS ONE* 10, e0130120. <https://doi.org/10.1371/journal.pone.0130120>
- Konoike, N., Kotozaki, Y., Miyachi, S., Miyauchi, C.M., Yomogida, Y., Akimoto, Y., Kuraoka, K., Sugiura, M., Kawashima, R., Nakamura, K., 2012. Rhythm information represented in the fronto-parieto-cerebellar motor system. *NeuroImage* 63, 328–338. <https://doi.org/10.1016/j.neuroimage.2012.07.002>
- Kotz, S.A., Gunter, T.C., 2015. Can rhythmic auditory cuing remediate language-related deficits in Parkinson’s disease? *Annals of the New York Academy of Sciences* 1337, 62–68. <https://doi.org/10.1111/nyas.12657>
- Kotz, S.A., Ravignani, A., Fitch, W.T., 2018. The Evolution of Rhythm Processing. *Trends in Cognitive Sciences, Special Issue: Time in the Brain* 22, 896–910.  
<https://doi.org/10.1016/j.tics.2018.08.002>
- Kotz, S.A., Schwartze, M., Schmidt-Kassow, M., 2009. Non-motor basal ganglia functions: A review and proposal for a model of sensory predictability in auditory language perception. *Cortex, Special Issue on “Parkinson’s Disease, Language and Cognition”* 45, 982–990. <https://doi.org/10.1016/j.cortex.2009.02.010>
- Kristensen, L.B., Engberg-Pedersen, E., Nielsen, A.H., Wallentin, M., 2013. The influence of context on word order processing – An fMRI study. *Journal of Neurolinguistics* 26, 73–88. <https://doi.org/10.1016/j.jneuroling.2012.05.001>
- Kristensen, L.B., Engberg-Pedersen, E., Wallentin, M., 2014. Context Predicts Word Order Processing in Broca’s Region. *Journal of Cognitive Neuroscience* 26, 2762–2777. [https://doi.org/10.1162/jocn\\_a\\_00681](https://doi.org/10.1162/jocn_a_00681)
- Kunert, R., Willems, R.M., Casasanto, D., Patel, A.D., Hagoort, P., 2015. Music and Language Syntax Interact in Broca’s Area: An fMRI Study. *PLOS ONE* 10, e0141069. <https://doi.org/10.1371/journal.pone.0141069>
- Kung, S.-J., Chen, J.L., Zatorre, R.J., Penhune, V.B., 2012. Interacting Cortical and Basal Ganglia Networks Underlying Finding and Tapping to the Musical Beat. *Journal of Cognitive Neuroscience* 25, 401–420. [https://doi.org/10.1162/jocn\\_a\\_00325](https://doi.org/10.1162/jocn_a_00325)
- Kuperberg, G.R., Jaeger, T.F., 2016. What do we mean by prediction in language comprehension? *Language, Cognition and Neuroscience* 31, 32–59.  
<https://doi.org/10.1080/23273798.2015.1102299>

- Lancaster, J.L., Tordesillas-Gutiérrez, D., Martínez, M., Salinas, F., Evans, A., Zilles, K., Mazziotta, J.C., Fox, P.T., 2007. Bias between MNI and Talairach coordinates analyzed using the ICBM-152 brain template. *Hum. Brain Mapp.* 28, 1194–1205. <https://doi.org/10.1002/hbm.20345>
- Lashley, K., 1951. The problem of serial order in behavior, in: *Cerebral Mechanisms in Behavior; the Hixon Symposium*. Wiley, Oxford, England, pp. 112–146.
- Lee, D., Newman, S.D., 2009. The effect of presentation paradigm on syntactic processing: An event-related fMRI study. *Hum. Brain Mapp.* 31, 65–79. <https://doi.org/10.1002/hbm.20845>
- Lee, Y.S., Min, N.E., Wingfield, A., Grossman, M., Peelle, J.E., 2016. Acoustic richness modulates the neural networks supporting intelligible speech processing. *Hearing Research* 333, 108–117. <https://doi.org/10.1016/j.heares.2015.12.008>
- Lee, Y.S., Wingfield, A., Min, N.-E., Kotloff, E., Grossman, M., Peelle, J.E., 2018. Differences in Hearing Acuity among “Normal-Hearing” Young Adults Modulate the Neural Basis for Speech Comprehension. *eNeuro* ENEURO.0263-17.2018. <https://doi.org/10.1523/ENEURO.0263-17.2018>
- Lerdahl, F., Jackendoff, R., 1983. An Overview of Hierarchical Structure in Music. *Music Perception: An Interdisciplinary Journal* 1, 229–252. <https://doi.org/10.2307/40285257>
- Levy, R., 2008. Expectation-based syntactic comprehension. *Cognition* 106, 1126–1177. <https://doi.org/10.1016/j.cognition.2007.05.006>
- Lima, C.F., Krishnan, S., Scott, S.K., 2016. Roles of Supplementary Motor Areas in Auditory Processing and Auditory Imagery. *Trends in Neurosciences* 39, 527–542. <https://doi.org/10.1016/j.tins.2016.06.003>
- Maess, B., Koelsch, S., Gunter, T.C., Friederici, A.D., 2001. Musical syntax is processed in Broca’s area: an MEG study. *Nature Neuroscience* 4, 540–545. <https://doi.org/10.1038/87502>
- Maffongelli, L., Bartoli, E., Sammler, D., Kölsch, S., Campus, C., Olivier, E., Fadiga, L., D’Ausilio, A., 2015. Distinct brain signatures of content and structure violation during action observation. *Neuropsychologia* 75, 30–39. <https://doi.org/10.1016/j.neuropsychologia.2015.05.020>
- Marchant, J.L., Driver, J., 2013. Visual and Audiovisual Effects of Isochronous Timing on Visual Perception and Brain Activity. *Cereb Cortex* 23, 1290–1298. <https://doi.org/10.1093/cercor/bhs095>
- McAuley, J.D., Henry, M.J., Tkach, J., 2012. Tempo mediates the involvement of motor areas in beat perception. *Annals of the New York Academy of Sciences* 1252, 77–84. <https://doi.org/10.1111/j.1749-6632.2011.06433.x>
- Meltzer, J.A., McArdle, J.J., Schafer, R.J., Braun, A.R., 2010. Neural Aspects of Sentence Comprehension: Syntactic Complexity, Reversibility, and Reanalysis. *Cereb Cortex* 20, 1853–1864. <https://doi.org/10.1093/cercor/bhp249>

- Merchant, H., Grahn, J., Trainor, L., Rohrmeier, M., Fitch, W.T., 2015. Finding the beat: a neural perspective across humans and non-human primates. *Phil. Trans. R. Soc. B* 370, 20140093. <https://doi.org/10.1098/rstb.2014.0093>
- Moher, D., Liberati, A., Tetzlaff, J., Altman, D.G., Group, T.P., 2009. Preferred Reporting Items for Systematic Reviews and Meta-Analyses: The PRISMA Statement. *PLOS Medicine* 6, e1000097. <https://doi.org/10.1371/journal.pmed.1000097>
- Moritz, C., Yampolsky, S., Papadelis, G., Thomson, J., Wolf, M., 2013. Links between early rhythm skills, musical training, and phonological awareness. *Read Writ* 26, 739–769. <https://doi.org/10.1007/s11145-012-9389-0>
- Nguyen, T., Gibbings, A., Grahn, J., 2018. Rhythm and Beat Perception, in: *Springer Handbook of Systematic Musicology*, Springer Handbooks. Springer, Berlin, Heidelberg, pp. 507–521. [https://doi.org/10.1007/978-3-662-55004-5\\_27](https://doi.org/10.1007/978-3-662-55004-5_27)
- Nozaradan, S., Peretz, I., Missal, M., Mouraux, A., 2011. Tagging the Neuronal Entrainment to Beat and Meter. *J. Neurosci.* 31, 10234–10240. <https://doi.org/10.1523/JNEUROSCI.0411-11.2011>
- Ogawa, K., Inui, T., Ohba, M., 2008. Syntactic processing of complex sentences in left lateral premotor cortex. *NeuroReport* 19, 811. <https://doi.org/10.1097/WNR.0b013e3282ffda89>
- Ohta, S., Fukui, N., Sakai, K.L., 2013. Syntactic computation in the human brain: the degree of merger as a key factor. *PLoS ONE* 8, e56230. <https://doi.org/10.1371/journal.pone.0056230>
- Ohta, S., Koizumi, M., Sakai, K.L., 2017. Dissociating Effects of Scrambling and Topicalization within the Left Frontal and Temporal Language Areas: An fMRI Study in Kaqchikel Maya. *Front. Psychol.* 8. <https://doi.org/10.3389/fpsyg.2017.00748>
- Ozernov-Palchik, O., Wolf, M., Patel, A.D., 2018. Relationships between early literacy and nonlinguistic rhythmic processes in kindergarteners. *Journal of Experimental Child Psychology* 167, 354–368. <https://doi.org/10.1016/j.jecp.2017.11.009>
- Patel, A.D., 2014. Can nonlinguistic musical training change the way the brain processes speech? The expanded OPERA hypothesis. *Hearing Research, Music: A window into the hearing brain* 308, 98–108. <https://doi.org/10.1016/j.heares.2013.08.011>
- Patel, A.D., Iversen, J.R., 2014. The evolutionary neuroscience of musical beat perception: the Action Simulation for Auditory Prediction (ASAP) hypothesis. *Front. Syst. Neurosci.* 8. <https://doi.org/10.3389/fnsys.2014.00057>
- Pattamadilok, C., Dehaene, S., Pallier, C., 2016. A role for left inferior frontal and posterior superior temporal cortex in extracting a syntactic tree from a sentence. *Cortex* 75, 44–55. <https://doi.org/10.1016/j.cortex.2015.11.012>
- Pearce, M., Rohrmeier, M., 2012. Music Cognition and the Cognitive Sciences. *Topics in Cognitive Science* 4, 468–484. <https://doi.org/10.1111/j.1756-8765.2012.01226.x>

- Peelle, J.E., McMillan, C., Moore, P., Grossman, M., Wingfield, A., 2004. Dissociable patterns of brain activity during comprehension of rapid and syntactically complex speech: Evidence from fMRI. *Brain and Language* 91, 315–325. <https://doi.org/10.1016/j.bandl.2004.05.007>
- Penhune, V.B., Doyon, J., 2002. Dynamic cortical and subcortical networks in learning and delayed recall of timed motor sequences. *J. Neurosci.* 22, 1397–1406.
- Prat, C.S., Just, M.A., 2011. Exploring the Neural Dynamics Underpinning Individual Differences in Sentence Comprehension. *Cereb Cortex* 21, 1747–1760. <https://doi.org/10.1093/cercor/bhq241>
- Przybylski, L., Bedoin, N., Krifi-Papoz, S., Herbillon, V., Roch, D., Léculier, L., Kotz, S.A., Tillmann, B., 2013. Rhythmic auditory stimulation influences syntactic processing in children with developmental language disorders. *Neuropsychology* 27, 121.
- Pulvermüller, F., 2014. The syntax of action. *Trends in Cognitive Sciences* 18, 219–220. <https://doi.org/10.1016/j.tics.2014.01.001>
- Repp, B.H., 2005. Sensorimotor synchronization: A review of the tapping literature. *Psychonomic Bulletin & Review* 12, 969–992. <https://doi.org/10.3758/BF03206433>
- Repp, B.H., Su, Y.-H., 2013. Sensorimotor synchronization: A review of recent research (2006–2012). *Psychon Bull Rev* 20, 403–452. <https://doi.org/10.3758/s13423-012-0371-2>
- Riecker, A., Wildgruber, D., Dogil, G., Grodd, W., Ackermann, H., 2002. Hemispheric Lateralization Effects of Rhythm Implementation during Syllable Repetitions: An fMRI Study. *NeuroImage* 16, 169–176. <https://doi.org/10.1006/nimg.2002.1068>
- Röder, B., Stock, O., Neville, H., Bien, S., Rösler, F., 2002. Brain Activation Modulated by the Comprehension of Normal and Pseudo-word Sentences of Different Processing Demands: A Functional Magnetic Resonance Imaging Study. *NeuroImage* 15, 1003–1014. <https://doi.org/10.1006/nimg.2001.1026>
- Rogalsky, C., Almeida, D., Sprouse, J., Hickok, G., 2015. Sentence processing selectivity in Broca’s area: evident for structure but not syntactic movement. *Language, Cognition and Neuroscience* 30, 1326–1338. <https://doi.org/10.1080/23273798.2015.1066831>
- Rogalsky, C., Matchin, W., Hickok, G., 2008. Broca’s area, sentence comprehension, and working memory: an fMRI study. *Front. Hum. Neurosci.* 2. <https://doi.org/10.3389/neuro.09.014.2008>
- Rohrmeier, M.A., Koelsch, S., 2012. Predictive information processing in music cognition. A critical review. *International Journal of Psychophysiology, Predictive information processing in the brain: Principles, neural mechanisms and models* 83, 164–175. <https://doi.org/10.1016/j.ijpsycho.2011.12.010>

- Roncaglia-Denissen, M.P., Schmidt-Kassow, M., Kotz, S.A., 2013. Speech Rhythm Facilitates Syntactic Ambiguity Resolution: ERP Evidence. *PLOS ONE* 8, e56000. <https://doi.org/10.1371/journal.pone.0056000>
- Rothermich, K., Schmidt-Kassow, M., Kotz, S.A., 2012. Rhythm's gonna get you: Regular meter facilitates semantic sentence processing. *Neuropsychologia* 50, 232–244. <https://doi.org/10.1016/j.neuropsychologia.2011.10.025>
- Sahin, N.T., Pinker, S., Cash, S.S., Schomer, D., Halgren, E., 2009. Sequential Processing of Lexical, Grammatical, and Phonological Information Within Broca's Area. *Science* 326, 445–449. <https://doi.org/10.1126/science.1174481>
- Sahin, N.T., Pinker, S., Halgren, E., 2006. Abstract Grammatical Processing of Nouns and Verbs in Broca's Area: Evidence from fMRI. *Cortex* 42, 540–562. [https://doi.org/10.1016/S0010-9452\(08\)70394-0](https://doi.org/10.1016/S0010-9452(08)70394-0)
- Sakreida, K., Higuchi, S., Di Dio, C., Ziessler, M., Turgeon, M., Roberts, N., Vogt, S., 2017. Cognitive Control Structures in the Imitation Learning of Spatial Sequences and Rhythms—An fMRI Study. *Cereb Cortex* 1–17. <https://doi.org/10.1093/cercor/bhw414>
- Santi, A., Friederici, A.D., Makuuchi, M., Grodzinsky, Y., 2015. An fMRI Study Dissociating Distance Measures Computed by Broca's Area in Movement Processing: Clause boundary vs Identity. *Front. Psychol.* 6. <https://doi.org/10.3389/fpsyg.2015.00654>
- Santi, A., Grodzinsky, Y., 2012. Broca's area and sentence comprehension: A relationship parasitic on dependency, displacement or predictability? *Neuropsychologia* 50, 821–832. <https://doi.org/10.1016/j.neuropsychologia.2012.01.017>
- Santi, A., Grodzinsky, Y., 2010. fMRI adaptation dissociates syntactic complexity dimensions. *NeuroImage* 51, 1285–1293. <https://doi.org/10.1016/j.neuroimage.2010.03.034>
- Santi, A., Grodzinsky, Y., 2007a. Working memory and syntax interact in Broca's area. *NeuroImage* 37, 8–17. <https://doi.org/10.1016/j.neuroimage.2007.04.047>
- Santi, A., Grodzinsky, Y., 2007b. Taxing working memory with syntax: Bihemispheric modulations. *Human Brain Mapping* 28, 1089–1097. <https://doi.org/10.1002/hbm.20329>
- Schell, M., Zaccarella, E., Friederici, A.D., 2017. Differential cortical contribution of syntax and semantics: An fMRI study on two-word phrasal processing. *Cortex* 96, 105–120. <https://doi.org/10.1016/j.cortex.2017.09.002>
- Schmidt-Kassow, M., Kotz, S.A., 2008a. Entrainment of syntactic processing? ERP-responses to predictable time intervals during syntactic reanalysis. *Brain Research* 1226, 144–155. <https://doi.org/10.1016/j.brainres.2008.06.017>



- Schmidt-Kassow, M., Kotz, S.A., 2008b. Event-related Brain Potentials Suggest a Late Interaction of Meter and Syntax in the P600. *Journal of Cognitive Neuroscience* 21, 1693–1708. <https://doi.org/10.1162/jocn.2008.21153>
- Schubotz, R.I., Cramon, D.Y. von, 2004. Sequences of Abstract Nonbiological Stimuli Share Ventral Premotor Cortex with Action Observation and Imagery. *J. Neurosci.* 24, 5467–5474. <https://doi.org/10.1523/JNEUROSCI.1169-04.2004>
- Shetreet, E., Friedmann, N., 2014. The processing of different syntactic structures: fMRI investigation of the linguistic distinction between wh-movement and verb movement. *Journal of Neurolinguistics* 27, 1–17. <https://doi.org/10.1016/j.jneuroling.2013.06.003>
- Shetreet, E., Friedmann, N., 2012. Stretched, jumped, and fell: An fMRI investigation of reflexive verbs and other intransitives. *NeuroImage* 60, 1800–1806. <https://doi.org/10.1016/j.neuroimage.2012.01.081>
- Shetreet, E., Friedmann, N., Hadar, U., 2009. An fMRI study of syntactic layers: Sentential and lexical aspects of embedding. *NeuroImage* 48, 707–716. <https://doi.org/10.1016/j.neuroimage.2009.07.001>
- Slevc, L.R., Rosenberg, J.C., Patel, A.D., 2009. Making psycholinguistics musical: Self-paced reading time evidence for shared processing of linguistic and musical syntax. *Psychonomic Bulletin & Review* 16, 374–381. <https://doi.org/10.3758/16.2.374>
- Snijders, T.M., Vosse, T., Kempen, G., Berkum, V., J.a, J., Petersson, K.M., Hagoort, P., 2009. Retrieval and Unification of Syntactic Structure in Sentence Comprehension: an fMRI Study Using Word-Category Ambiguity. *Cereb Cortex* 19, 1493–1503. <https://doi.org/10.1093/cercor/bhn187>
- Staub, A., 2015. The Effect of Lexical Predictability on Eye Movements in Reading: Critical Review and Theoretical Interpretation. *Language and Linguistics Compass* 9, 311–327. <https://doi.org/10.1111/lnc3.12151>
- Stowe, L.A., Paans, A.M.J., Wijers, A.A., Zwarts, F., Mulder, G., Vaalburg, W., 1999. Sentence comprehension and word repetition: A positron emission tomography investigation. *Psychophysiology* 36, 786–801.
- Strait, D.L., Hornickel, J., Kraus, N., 2011. Subcortical processing of speech regularities underlies reading and music aptitude in children. *Behavioral and Brain Functions* 7, 44. <https://doi.org/10.1186/1744-9081-7-44>
- Sturt, P., Crocker, M., 1996. Monotonic Syntactic Processing: A Cross-linguistic Study of Attachment and Reanalysis. *Language and Cognitive Processes* 11, 449–494. <https://doi.org/10.1080/016909696387123>
- Sun, Y., Lu, X., Ho, H.T., Johnson, B.W., Sammler, D., Thompson, W.F., 2018. Syntactic processing in music and language: Parallel abnormalities observed in congenital amusia. *NeuroImage: Clinical* 19, 640–651. <https://doi.org/10.1016/j.nicl.2018.05.032>

- Tanaka, K., Ohta, S., Kinno, R., Sakai, K.L., 2017. Activation changes of the left inferior frontal gyrus for the factors of construction and scrambling in a sentence. *Proceedings of the Japan Academy, Series B* 93, 511–522.  
<https://doi.org/10.2183/pjab.93.031>
- Teki, S., 2016. A Citation-Based Analysis and Review of Significant Papers on Timing and Time Perception. *Front. Neurosci.* 10.  
<https://doi.org/10.3389/fnins.2016.00330>
- Teki, S., Grube, M., Griffiths, T.D., 2012. A Unified Model of Time Perception Accounts for Duration-Based and Beat-Based Timing Mechanisms. *Front. Integr. Neurosci.* 5. <https://doi.org/10.3389/fnint.2011.00090>
- Thaut, M.H., Demartin, M., Sanes, J.N., 2008. Brain Networks for Integrative Rhythm Formation. *PLOS ONE* 3, e2312. <https://doi.org/10.1371/journal.pone.0002312>
- Thomson, J.M., Goswami, U., 2008. Rhythmic processing in children with developmental dyslexia: Auditory and motor rhythms link to reading and spelling. *Journal of Physiology-Paris, Links and Interactions Between Language and Motor Systems in the Brain* 102, 120–129.  
<https://doi.org/10.1016/j.jphysparis.2008.03.007>
- Trost, W., Frühholz, S., Schön, D., Labbé, C., Pichon, S., Grandjean, D., Vuilleumier, P., 2014. Getting the beat: Entrainment of brain activity by musical rhythm and pleasantness. *NeuroImage* 103, 55–64.  
<https://doi.org/10.1016/j.neuroimage.2014.09.009>
- Turkeltaub, P.E., Eden, G.F., Jones, K.M., Zeffiro, T.A., 2002. Meta-Analysis of the Functional Neuroanatomy of Single-Word Reading: Method and Validation. *NeuroImage* 16, 765–780. <https://doi.org/10.1006/nimg.2002.1131>
- Turkeltaub, P.E., Eickhoff, S.B., Laird, A.R., Fox, M., Wiener, M., Fox, P., 2012. Minimizing within-experiment and within-group effects in activation likelihood estimation meta-analyses. *Hum. Brain Mapp.* 33, 1–13.  
<https://doi.org/10.1002/hbm.21186>
- Tyler, L.K., Randall, B., Stamatakis, E.A., 2008. Cortical Differentiation for Nouns and Verbs Depends on Grammatical Markers. *Journal of Cognitive Neuroscience* 20, 1381–1389.
- van der Steen, M., Christine, M., Keller, P.E., 2013. The ADaptation and Anticipation Model (ADAM) of sensorimotor synchronization. *Front. Hum. Neurosci.* 7.  
<https://doi.org/10.3389/fnhum.2013.00253>
- Vassal, F., Boutet, C., Lemaire, J.-J., Nuti, C., 2014. New insights into the functional significance of the frontal aslant tract: an anatomo-functional study using intraoperative electrical stimulations combined with diffusion tensor imaging-based fiber tracking. *British Journal Of Neurosurgery* 28, 685–687.  
<https://doi.org/10.3109/02688697.2014.889810>

- Vuust, P., Roepstorff, A., Wallentin, M., Mouridsen, K., Østergaard, L., 2006. It don't mean a thing...: Keeping the rhythm during polyrhythmic tension, activates language areas (BA47). *NeuroImage* 31, 832–841.  
<https://doi.org/10.1016/j.neuroimage.2005.12.037>
- Vuust, P., Wallentin, M., Mouridsen, K., Østergaard, L., Roepstorff, A., 2011. Tapping polyrhythms in music activates language areas. *Neuroscience Letters* 494, 211–216. <https://doi.org/10.1016/j.neulet.2011.03.015>
- Vuust, P., Witek, M.A.G., 2014. Rhythmic complexity and predictive coding: a novel approach to modeling rhythm and meter perception in music. *Front. Psychol.* 5. <https://doi.org/10.3389/fpsyg.2014.01111>
- Wiener, M., Turkeltaub, P., Coslett, H.B., 2010. The image of time: A voxel-wise meta-analysis. *NeuroImage* 49, 1728–1740.  
<https://doi.org/10.1016/j.neuroimage.2009.09.064>
- Yang, Y.-H., Marslen-Wilson, W.D., Bozic, M., 2017. Syntactic Complexity and Frequency in the Neurocognitive Language System. *Journal of Cognitive Neuroscience* 29, 1605–1620. [https://doi.org/10.1162/jocn\\_a\\_01137](https://doi.org/10.1162/jocn_a_01137)
- Ye, Z., Zhou, X., 2009. Conflict control during sentence comprehension: fMRI evidence. *NeuroImage* 48, 280–290. <https://doi.org/10.1016/j.neuroimage.2009.06.032>
- Zaccarella, E., Meyer, L., Makuuchi, M., Friederici, A.D., 2017. Building by Syntax: The Neural Basis of Minimal Linguistic Structures. *Cereb Cortex* 27, 411–421.  
<https://doi.org/10.1093/cercor/bhv234>
- Zatorre, R.J., Zarate, J.M., 2012. Cortical Processing of Music, in: Poeppel, D., Overath, T., Popper, A.N., Fay, R.R. (Eds.), *The Human Auditory Cortex*, Springer Handbook of Auditory Research. Springer New York, New York, NY, pp. 261–294. [https://doi.org/10.1007/978-1-4614-2314-0\\_10](https://doi.org/10.1007/978-1-4614-2314-0_10)
- Zhuang, J., Devereux, B.J., 2017. Phonological and syntactic competition effects in spoken word recognition: evidence from corpus-based statistics. *Language, Cognition and Neuroscience* 32, 221–235.  
<https://doi.org/10.1080/23273798.2016.1241886>



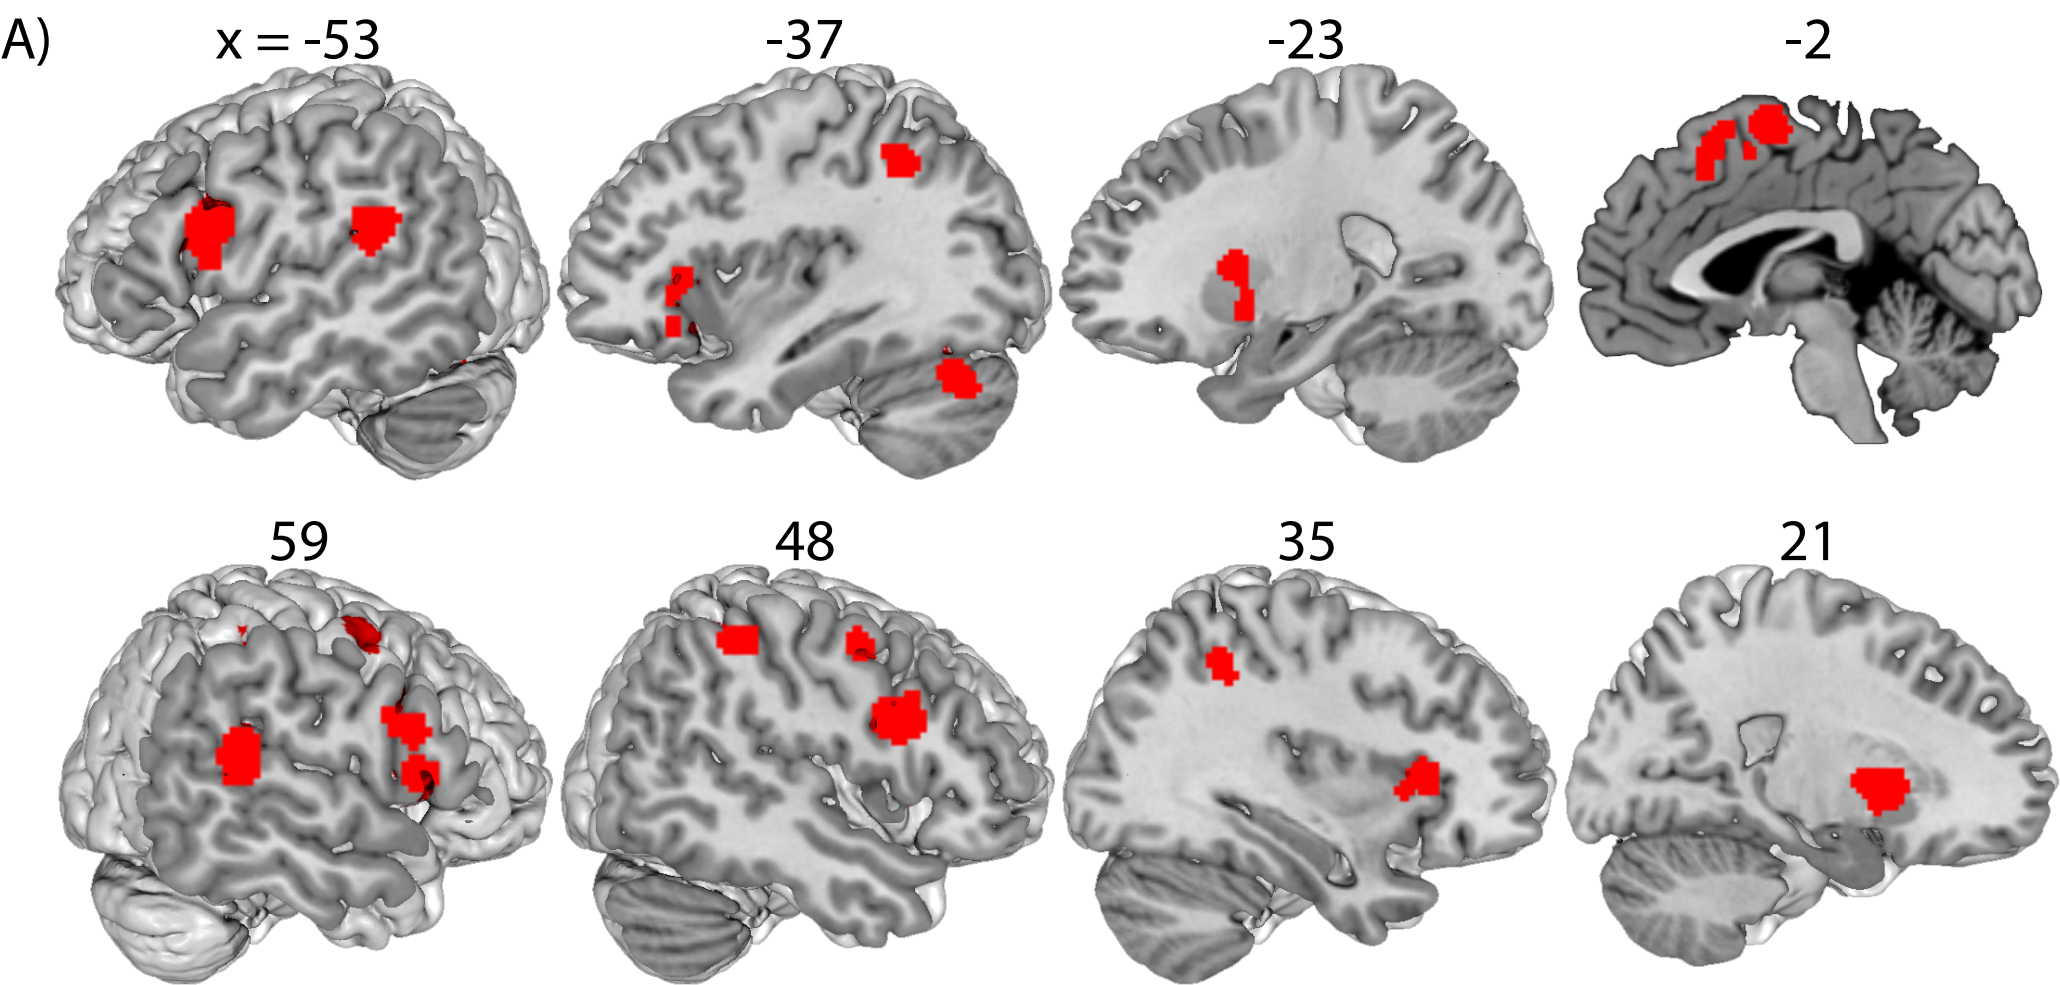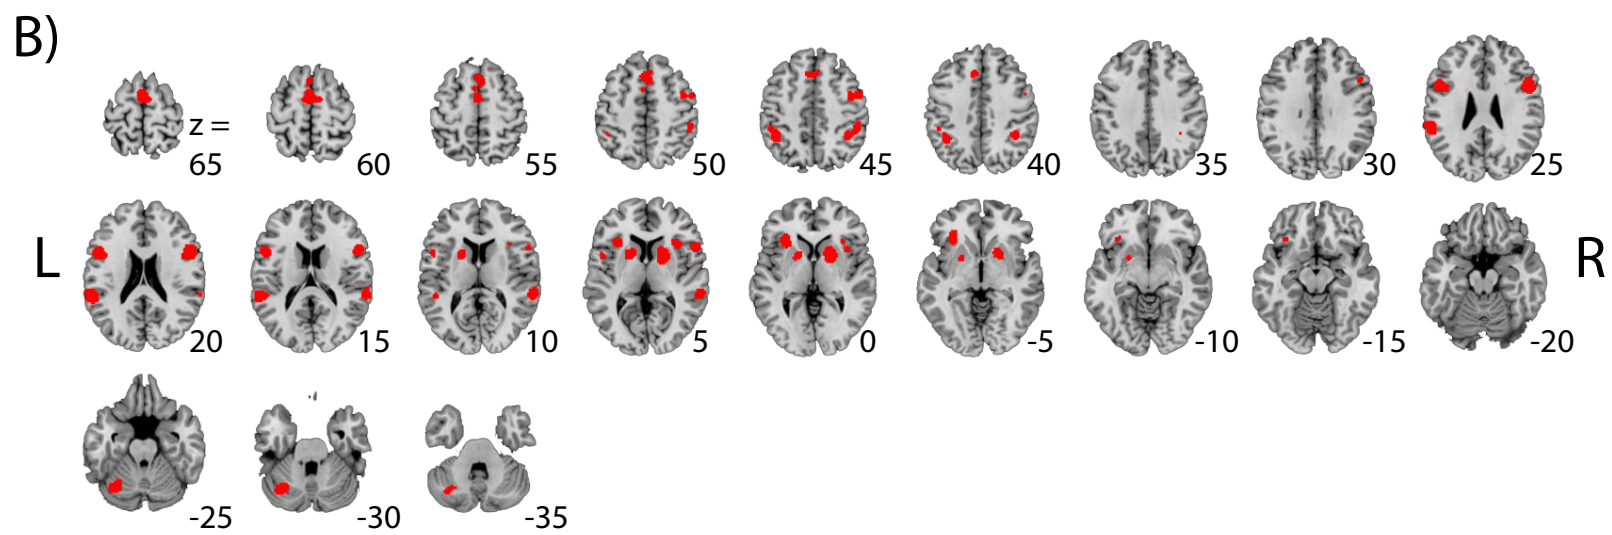

A)

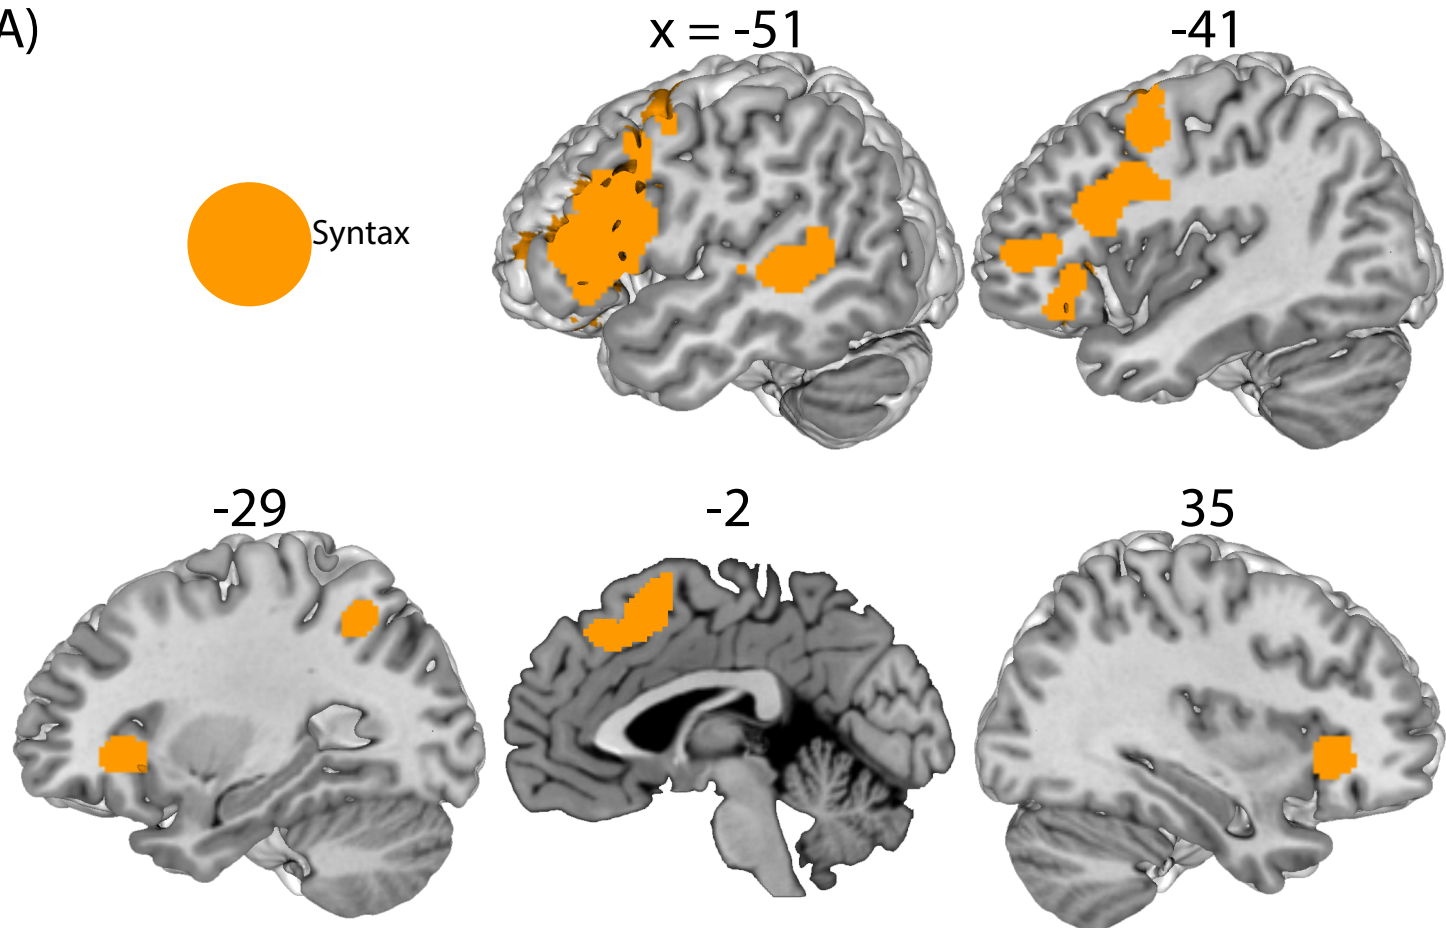

B)

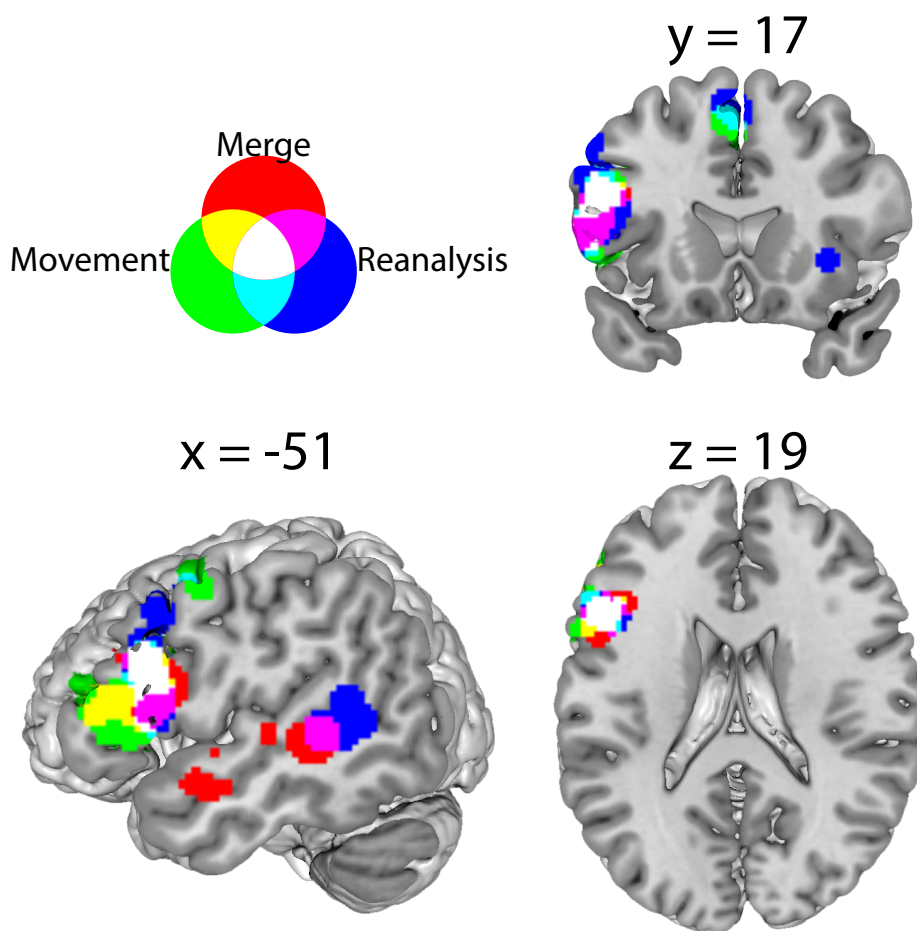

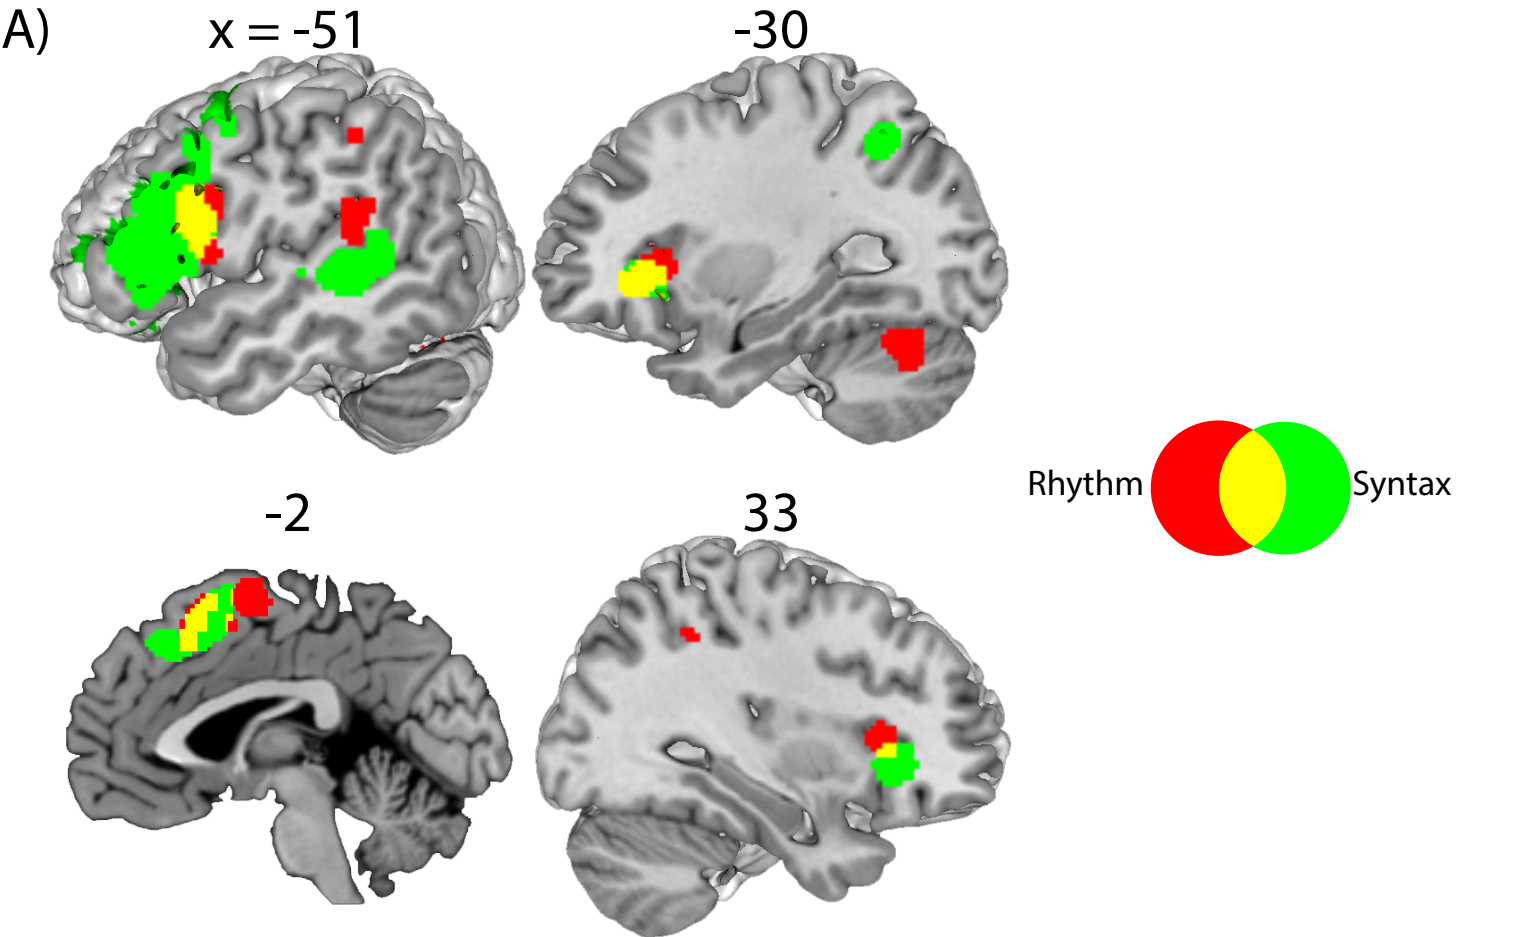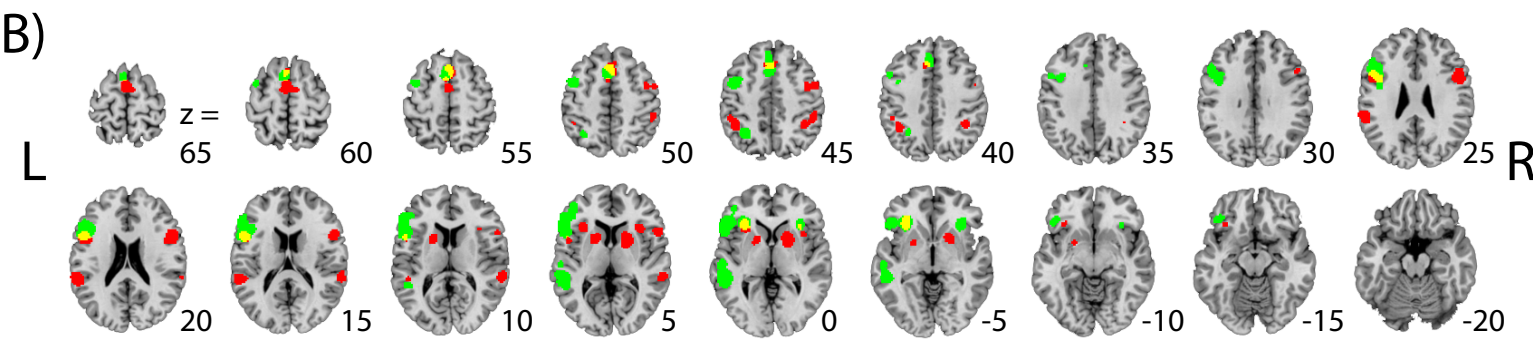

A)

x = -51

x = -37

x = -2

x = 35

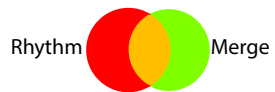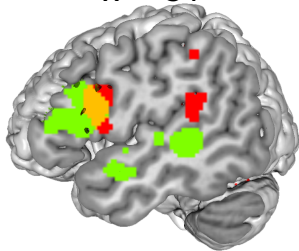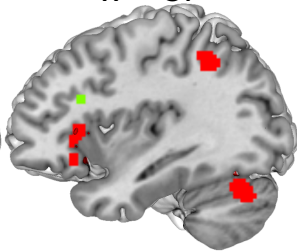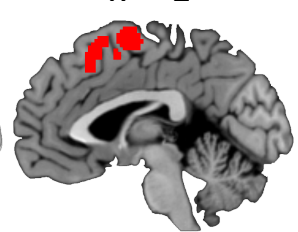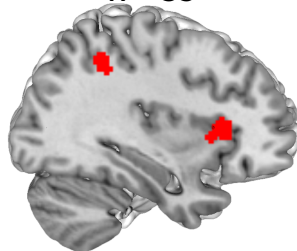

B)

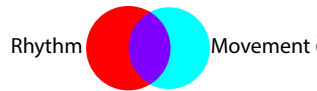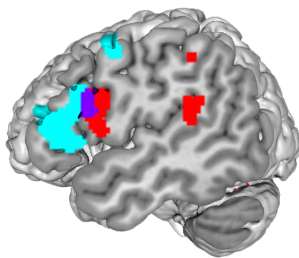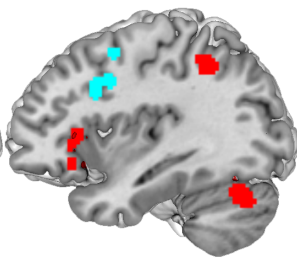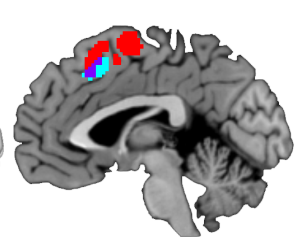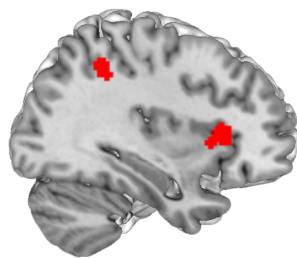

C)

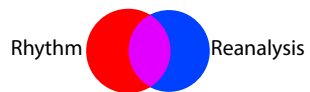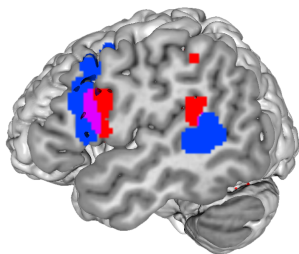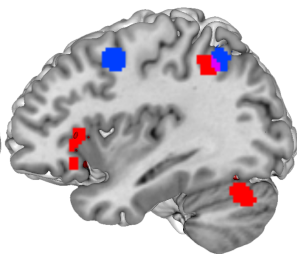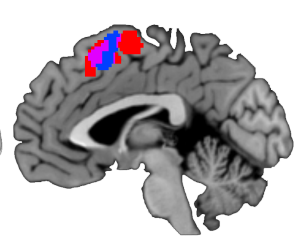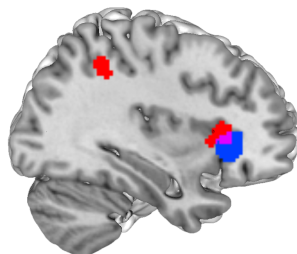



| # Authors                   | Category | Task                 | Sensory Modality | # Subjects | # Foci     |
|-----------------------------|----------|----------------------|------------------|------------|------------|
| 1 Araneda et al., 2017      | Beat     | Beat detection       | AUD, VIS & TAC   | 27         | 40         |
| 2 Geiser et al., 2012       | Beat     | Pseudopass. obs.     | AUD              | 17         | 2          |
| 3 Grahn and Rowe, 2013      | Beat     | Pseudopass. obs.     | AUD              | 24         | 19         |
| 4 Kung et al., 2012         | Beat     | Mixed tasks          | AUD              | 11         | 62         |
| 5 Marchant and Driver, 2013 | Beat     | Pseudopass. obs.     | AUD & VIS        | 16         | 11         |
| 6 McAuley et al., 2012      | Beat     | Discrimination       | AUD              | 15         | 61         |
| 7 Bolger et al., 2014       | Meter    | Pseudopass. obs.     | AUD & VIS        | 17         | 1          |
| 8 J. L. Chen et al., 2006   | Meter    | Production           | AUD              | 11         | 5          |
| 9 Danielsen et al., 2014    | Meter    | Passive obs.         | AUD              | 19         | 4          |
| 10 Thaut et al., 2008       | Meter    | Production           | AUD              | 12         | 6          |
| 11 Trost et al., 2014       | Meter    | Pseudopass. obs.     | AUD & VIS        | 18         | 10         |
| 12 Vuust et al., 2011, 2006 | Meter    | Production           | AUD              | 18         | 7          |
| 13 Bengtsson et al., 2004   | Rhythm   | Production           | AUD              | 7          | 11         |
| 14 Bengtsson et al., 2005   | Rhythm   | Production           | AUD              | 7          | 6          |
| 15 Foster and Zatorre, 2010 | Rhythm   | Same-diff. judgement | AUD              | 31         | 17         |
| 16 Jungblut et al., 2012    | Rhythm   | Production           | AUD              | 30         | 12         |
| 17 Penhune and Doyon, 2002  | Rhythm   | Production           | VIS              | 9          | 21         |
| 18 Riecker et al., 2002     | Rhythm   | Production           | AUD              | 12         | 5          |
| 19 Bengtsson et al., 2009   | Mixed    | Passive obs.         | AUD              | 17         | 19         |
| 20 & 21 Chen et al., 2007   | Mixed    | Production           | AUD              | 12         | 15         |
|                             |          |                      |                  | 12         | 14         |
| 22 Konoike et al., 2012     | Mixed    | Working memory       | AUD & VIS        | 17         | 32         |
| 23 Konoike et al., 2015     | Mixed    | Working memory       | AUD              | 23         | 20         |
| 24 Sakreida et al., 2017    | Mixed    | Production           | VIS              | 28         | 15         |
| <b>Grand Total:</b>         |          |                      |                  | <b>410</b> | <b>415</b> |

**Table 1: All experiments included in the rhythm ALE analysis.** AUD: auditory; VIS: visual; TAC: tactile; Pseudopass. obs.: pseudopassive observation; Passive obs: passive observation; Same-diff. judgement: same-different judgement.

| # Authors                              | Category   | Task                 | Sensory Modality | # Subjects | # Foci |
|----------------------------------------|------------|----------------------|------------------|------------|--------|
| 25 Bonhage et al., 2014                | Merge      | Recall               | VIS              | 18         | 28     |
| 26 Bozic et al., 2015                  | Merge      | Pseudopass. obs.     | AUD              | 18         | 7      |
| 27 Bulut et al., 2017                  | Merge      | Pseudopass. obs.     | VIS              | 24         | 7      |
| 28 Chan et al., 2013                   | Merge      | Covert production    | VIS              | 24         | 7      |
| 29 & 30 Goucha and Friederici, 2015    | Merge      | Pseudopass. obs.     | AUD & VIS        | 23         | 8      |
|                                        |            |                      |                  | 32         | 4      |
| 31 Hillen et al., 2013                 | Merge      | Pseudopass. obs.     | VIS              | 20         | 6      |
| 32 Hung et al., 2015                   | Merge      | Overt production     | VIS              | 40         | 8      |
| 33 Ohta et al., 2013                   | Merge      | Pseudopass. obs.     | VIS              | 18         | 11     |
| 34 Schell et al., 2017                 | Merge      | Pseudopass. obs.     | AUD              | 21         | 7      |
| 35 Snijders et al., 2009               | Merge      | Pseudopass. obs.     | VIS              | 28         | 24     |
| 36 Stowe et al., 1999*                 | Merge      | Passive obs.         | VIS              | 12         | 8      |
| 37 Tyler et al., 2008                  | Merge      | Pseudopass. obs.     | VIS              | 15         | 8      |
| 38 Yang et al., 2017                   | Merge      | Pseudopass. obs.     | AUD              | 18         | 7      |
| 39 Zaccarella et al., 2017             | Merge      | Pseudopass. obs.     | VIS              | 18         | 2      |
| 40 Zhuang and Devereux, 2017           | Merge      | Pseudopass. obs.     | AUD              | 16         | 6      |
| 41 Feng et al., 2015                   | Movement   | Sent.-pict. matching | VIS              | 18         | 8      |
| 42 Koizumi and Kim, 2016               | Movement   | Pseudopass. obs.     | AUD              | 16         | 1      |
| 43 Kristensen et al., 2014             | Movement   | Pseudopass. obs.     | AUD & VIS        | 32         | 4      |
| 44 Ohta et al., 2017                   | Movement   | Sent.-pict. matching | AUD & VIS        | 17         | 26     |
| 45 Rogalsky et al., 2015               | Movement   | Pseudopass. obs.     | AUD              | 15         | 11     |
| 46 Santi et al., 2015                  | Movement   | Pseudopass. obs.     | VIS              | 21         | 8      |
| 47 Santi and Grodzinsky, 2010          | Movement   | Pseudopass. obs.     | AUD              | 17         | 1      |
| 48 Santi and Grodzinsky, 2012          | Movement   | Pseudopass. obs.     | AUD              | 14         | 11     |
| 49 Shetreet and Friedmann, 2012        | Movement   | Pseudopass. obs.     | AUD              | 23         | 4      |
| 50 Shetreet and Friedmann, 2014        | Movement   | Pseudopass. obs.     | AUD              | 22         | 6      |
| 51 Shetreet et al., 2009               | Movement   | Pseudopass. obs.     | AUD              | 19         | 12     |
| 52 Tanaka et al., 2017                 | Movement   | Sent.-pict. matching | VIS              | 16         | 11     |
| 53 Ye and Zhou, 2009                   | Movement   | Pseudopass. obs.     | VIS              | 21         | 4      |
| 54 Bornkessel-Schlesewsky et al., 2009 | Reanalysis | Pseudopass. obs.     | VIS              | 30         | 7      |
| 55 Caplan et al., 2007*                | Reanalysis | Pseudopass. obs.     | VIS              | 15         | 13     |
| 56 Caplan et al., 2008                 | Reanalysis | Pseudopass. obs.     | VIS              | 16         | 14     |
| 57 E. Chen et al., 2006*               | Reanalysis | Pseudopass. obs.     | VIS              | 12         | 28     |
| 58 Cooke et al., 2001*                 | Reanalysis | Pseudopass. obs.     | VIS              | 7          | 7      |
| 59 Hsu et al., 2017                    | Reanalysis | Pseudopass. obs.     | VIS              | 28         | 7      |
| 60 Kinno et al., 2008*                 | Reanalysis | Sent.-pict. matching | VIS              | 14         | 3      |
| 61 Kristensen et al., 2013             | Reanalysis | Pseudopass. obs.     | VIS              | 21         | 10     |
| 62 Kunert et al., 2015                 | Reanalysis | Pseudopass. obs.     | AUD & VIS        | 19         | 1      |
| 63 Lee and Newman, 2009                | Reanalysis | Pseudopass. obs.     | VIS              | 18         | 12     |
| 64 Lee et al., 2016                    | Reanalysis | Pseudopass. obs.     | VIS              | 26         | 21     |
| 65 Lee et al., 2018                    | Reanalysis | Pseudopass. obs.     | VIS              | 35         | 3      |
| 66 Meltzer et al., 2010                | Reanalysis | Mixed tasks          | AUD & VIS        | 24         | 8      |

|                     |                           |            |                  |     |     |     |
|---------------------|---------------------------|------------|------------------|-----|-----|-----|
| 67                  | Ogawa et al., 2008        | Reanalysis | Pseudopass. obs. | VIS | 21  | 7   |
| 68                  | Pattamadilok et al., 2016 | Reanalysis | Pseudopass. obs. | VIS | 20  | 26  |
| 69                  | Peelle et al., 2004*      | Reanalysis | Pseudopass. obs. | AUD | 8   | 2   |
| 70                  | Prat and Just, 2011       | Reanalysis | Pseudopass. obs. | VIS | 27  | 19  |
| 71                  | Röder et al., 2002*       | Reanalysis | Pseudopass. obs. | AUD | 11  | 5   |
| 72                  | Rogalsky et al., 2008     | Reanalysis | Pseudopass. obs. | AUD | 15  | 7   |
| 73                  | Shetreet et al., 2009     | Reanalysis | Pseudopass. obs. | AUD | 19  | 12  |
| <b>Grand Total:</b> |                           |            |                  |     | 981 | 467 |

**Table 2: All experiments included in the syntax ALE analysis.** VIS: visual; AUD: auditory; Pseudopass. obs.: pseudopassive observation; Passive obs.: passive observation; Sent.-pict. matching: sentence-picture matching. Asterisks indicate studies that were excluded when the syntax experiments were run as one sample.

| Hemi. | Vol. | WC    |       |       | WC Label<br>(Anatomy)      | EV  |     |     | EV Label<br>(Anatomy)      | Contributing Experiments          |
|-------|------|-------|-------|-------|----------------------------|-----|-----|-----|----------------------------|-----------------------------------|
|       |      | x     | y     | z     |                            | x   | y   | z   |                            |                                   |
| R     | 3248 | 52.4  | 11.6  | 18.8  | IFG (pars Opercularis)     | 52  | 10  | 20  | IFG (pars Opercularis)     | 1, 4, 5, 6, 9, 15, 18, 22, 23, 24 |
|       |      |       |       |       |                            | 56  | 16  | 6   | IFG (pars Opercularis)     |                                   |
| R     | 2272 | 19    | 7.6   | 1     | Pallidum/Putamen*          | 18  | 10  | 0   | None                       | 1, 2, 4, 5, 6, 13, 24             |
| L     | 2264 | -49.3 | 9.6   | 19.1  | IFG (pars Opercularis)     | -50 | 10  | 20  | IFG (pars Opercularis)     | 1, 4, 6, 15, 16, 22, 23, 24       |
|       |      |       |       |       |                            | -42 | 6   | 24  | IFG (pars Opercularis)     |                                   |
|       |      |       |       |       |                            | -48 | 6   | 6   | IFG (pars Opercularis)     |                                   |
| L     | 2152 | -0.2  | -3.2  | 62.2  | Post-Med. Frontal/SMA*     | -2  | -2  | 62  | Post-Med. Frontal/SMA*     | 1, 3, 10, 15, 19, 20, 21, 24      |
| L     | 2136 | -57.7 | -38.2 | 19.7  | STG/TPJ*                   | -58 | -40 | 20  | STG/TPJ*                   | 1, 6, 8, 9, 13, 14, 15, 22, 24    |
|       |      |       |       |       |                            | -48 | -38 | 10  | STG/TPJ*                   |                                   |
| R & L | 2096 | -0.6  | 18    | 50.4  | Post-Med. Frontal/pre-SMA* | 2   | 16  | 52  | Post-Med. Frontal/pre-SMA* | 1, 4, 6, 13, 15, 16, 19, 20, 21   |
|       |      |       |       |       |                            | -6  | 24  | 42  | Supramarginal Gyrus        |                                   |
|       |      |       |       |       |                            | -2  | 14  | 60  | Post-Med. Frontal/pre-SMA* |                                   |
|       |      |       |       |       |                            | 4   | 26  | 48  | Supramarginal Gyrus        |                                   |
|       |      |       |       |       |                            | -4  | 6   | 52  | Post-Med. Frontal/pre-SMA* |                                   |
| L     | 1728 | -31.5 | 24.5  | -1.8  | Insula                     | -32 | 22  | 2   | Insula                     | 1, 4, 5, 12, 15, 16, 22, 24       |
|       |      |       |       |       |                            | -34 | 26  | -12 | IFG (pars Orbitalis)       |                                   |
| L     | 1576 | -32.1 | -66   | -28.2 | Cerebellum (Crus 1)        | -34 | -66 | -28 | Cerebellum (Crus 1)        | 1, 13, 15, 20, 21, 22, 23, 24     |
| L     | 1432 | -18.5 | 7.3   | 3.8   | Pallidum                   | -18 | 8   | 8   | Putamen                    | 1, 2, 3, 4, 6, 23, 24             |
|       |      |       |       |       |                            | -22 | 4   | -8  | Putamen                    |                                   |
| R     | 1424 | 61.5  | -36.2 | 10.9  | STG/TPJ*                   | 62  | -36 | 8   | STG/TPJ*                   | 1, 4, 6, 9, 18, 24                |
| R     | 1288 | 43.5  | -42.4 | 44.3  | IPL                        | 38  | -46 | 42  | IPL                        | 1, 10, 22, 23, 24                 |
|       |      |       |       |       |                            | 50  | -38 | 46  | IPL                        |                                   |
| L     | 1288 | -42.2 | -45.8 | 43.5  | IPL                        | -42 | -46 | 46  | IPL                        | 1, 7, 21, 22, 23, 24              |
|       |      |       |       |       |                            | -38 | -50 | 40  | IPL                        |                                   |
|       |      |       |       |       |                            | -48 | -40 | 44  | IPL                        |                                   |
| R     | 1056 | 46.6  | -1.6  | 46.5  | Precentral Gyrus/PMC*      | 52  | -2  | 46  | Precentral Gyrus/PMC*      | 1, 4, 6, 15, 21, 24               |
|       |      |       |       |       |                            | 42  | 0   | 48  | Precentral Gyrus/PMC*      |                                   |
| R     | 768  | 35    | 19.4  | 3.9   | Insula                     | 34  | 20  | 6   | Insula                     | 1, 4, 5, 15                       |

**Table 3: Rhythm clusters found by ALE analysis.** WC: the weighted center of the cluster; EV: the extrema value; IFG: inferior frontal gyrus; Post-Med. Frontal: posterior-medial frontal; STG: superior temporal gyrus; TPJ: tempoparietal junction; IPL: intraparietal lobule; PMC: premotor cortex. Asterisk indicates that the second anatomical label was assigned manually by the authors.

| Hemi. | Vol.  | WC    |       |      | WC Label<br>(Anatomy)      | EV  |     |     | EV Label<br>(Anatomy)      | Contributing Experiments                                                                                                            |
|-------|-------|-------|-------|------|----------------------------|-----|-----|-----|----------------------------|-------------------------------------------------------------------------------------------------------------------------------------|
|       |       | x     | y     | z    |                            | x   | y   | z   |                            |                                                                                                                                     |
| L     | 17464 | -47.5 | 21.4  | 11.1 | IFG (pars Triangularis)    | -50 | 16  | 18  | IFG (pars Opercularis)     | 25, 28, 29, 30, 32, 33, 34, 35,<br>36, 37, 38, 39, 40, 41, 43, 44,<br>45, 47, 48, 49, 50, 51, 53, 54,<br>55, 56, 58, 60, 61, 62, 63 |
|       |       |       |       |      |                            | -54 | 30  | 10  | IFG (pars Triangularis)    |                                                                                                                                     |
|       |       |       |       |      |                            | -32 | 26  | -2  | Insula                     |                                                                                                                                     |
|       |       |       |       |      |                            | -48 | 26  | -4  | IFG (pars Orbitalis)       |                                                                                                                                     |
|       |       |       |       |      |                            | -46 | 36  | 6   | IFG (pars Triangularis)    |                                                                                                                                     |
|       |       |       |       |      |                            | -44 | 44  | 4   | IFG (pars Triangularis)    |                                                                                                                                     |
|       |       |       |       |      |                            | -42 | 4   | 28  | IFG (pars Opercularis)     |                                                                                                                                     |
|       |       |       |       |      |                            | -42 | 32  | -14 | IFG (pars Orbitalis)       |                                                                                                                                     |
|       |       |       |       |      |                            | -50 | 12  | 40  | MFG                        |                                                                                                                                     |
| L     | 4520  | -3    | 17    | 50.8 | Post-Med. Frontal/pre-SMA* | -2  | 16  | 50  | Post-Med. Frontal/pre-SMA* | 28, 31, 32, 33, 40, 41, 49, 51,<br>52, 53, 55, 56, 58, 60, 61                                                                       |
|       |       |       |       |      |                            | -4  | 28  | 42  | Superior Medial Gyrus      |                                                                                                                                     |
| L     | 4376  | -54.6 | -35.7 | 1.1  | MTG                        | -56 | -42 | 2   | MTG                        | 26, 28, 29, 30, 34, 35, 36, 37,<br>47, 53, 55, 57, 60, 63                                                                           |
|       |       |       |       |      |                            | -54 | -36 | 0   | MTG                        |                                                                                                                                     |
|       |       |       |       |      |                            | -58 | -22 | 0   | MTG                        |                                                                                                                                     |
|       |       |       |       |      |                            | -48 | -46 | 10  | MTG                        |                                                                                                                                     |
| L     | 2032  | -42   | 2.3   | 48.1 | Precentral Gyrus/PMC*      | -42 | 2   | 48  | Precentral Gyrus/PMC*      | 38, 41, 49, 53, 55, 58, 60, 61                                                                                                      |
|       |       |       |       |      |                            | -38 | 2   | 58  | Precentral Gyrus/PMC*      |                                                                                                                                     |
| R     | 1288  | 33.3  | 25.1  | -3.7 | Insula                     | 32  | 24  | -4  | Insula                     | 28, 40, 51, 53, 56, 60                                                                                                              |
| L     | 928   | -30.4 | -57   | 45.3 | IPL                        | -30 | -58 | 46  | IPL                        | 33, 51, 53, 55, 59, 60                                                                                                              |

**Table 4: Clusters found by the combined syntax ALE analysis.** WC: the weighted center of the cluster; EV: the extrema value; IFG: inferior frontal gyrus; MFG: middle frontal gyrus; MTG: middle temporal gyrus; STG: superior temporal gyrus; Post.-Med. Frontal: posterior-medial frontal; SMA: supplementary motor area; PMC: premotor cortex; IPL; intraparietal lobule. Asterisk indicates that the second anatomical label was assigned manually by the authors.

|            | Hemi. | Vol. | WC    |       |      | WC Label<br>(Anatomy)       | EV  |      |      | EV Label<br>(Anatomy)       | Contributing Experiments                   |        |    |      |       |       |      |     |    |      |       |     |      |                       |    |    |    |    |    |
|------------|-------|------|-------|-------|------|-----------------------------|-----|------|------|-----------------------------|--------------------------------------------|--------|----|------|-------|-------|------|-----|----|------|-------|-----|------|-----------------------|----|----|----|----|----|
|            |       |      | x     | y     | z    |                             | x   | y    | z    |                             |                                            |        |    |      |       |       |      |     |    |      |       |     |      |                       |    |    |    |    |    |
| Merge      | L     | 5688 | -50.9 | 19.8  | 12.8 | IFG (pars Triangularis)     | -50 | 12   | 16   | IFG (pars Opercularis)      | 28, 29, 30, 32, 34, 35, 36, 37, 38, 39, 40 |        |    |      |       |       |      |     |    |      |       |     |      |                       |    |    |    |    |    |
|            |       |      |       |       |      |                             | -54 | 20   | 8    | IFG (pars Triangularis)     |                                            |        |    |      |       |       |      |     |    |      |       |     |      |                       |    |    |    |    |    |
|            |       |      |       |       |      |                             | -54 | 26   | 10   | IFG (pars Triangularis)     |                                            |        |    |      |       |       |      |     |    |      |       |     |      |                       |    |    |    |    |    |
|            |       |      |       |       |      |                             | -44 | 36   | 4    | IFG (pars Triangularis)     |                                            |        |    |      |       |       |      |     |    |      |       |     |      |                       |    |    |    |    |    |
|            |       |      |       |       |      |                             | -42 | 20   | 22   | IFG (pars Triangularis)     |                                            |        |    |      |       |       |      |     |    |      |       |     |      |                       |    |    |    |    |    |
|            |       |      |       |       |      |                             | -52 | -34  | -2   | MTG                         |                                            |        |    |      |       |       |      |     |    |      |       |     |      |                       |    |    |    |    |    |
| Movement   | L     | 3640 | -54.8 | -31.9 | -0.8 | MTG                         | -58 | -22  | 0    | MTG                         | 26, 28, 29, 30, 34, 35, 37, 38, 39, 40     |        |    |      |       |       |      |     |    |      |       |     |      |                       |    |    |    |    |    |
|            |       |      |       |       |      |                             | -54 | 2    | -16  | MTG                         |                                            |        |    |      |       |       |      |     |    |      |       |     |      |                       |    |    |    |    |    |
|            |       |      |       |       |      |                             | -56 | -6   | -16  | MTG                         |                                            |        |    |      |       |       |      |     |    |      |       |     |      |                       |    |    |    |    |    |
|            |       |      |       |       |      |                             | -56 | -6   | -6   | STG                         |                                            |        |    |      |       |       |      |     |    |      |       |     |      |                       |    |    |    |    |    |
|            |       |      |       |       |      |                             | -54 | 30   | 4    | IFG (pars Triangularis)     |                                            |        |    |      |       |       |      |     |    |      |       |     |      |                       |    |    |    |    |    |
|            |       |      |       |       |      |                             | -50 | 18   | 22   | IFG (pars Triangularis)     |                                            |        |    |      |       |       |      |     |    |      |       |     |      |                       |    |    |    |    |    |
| Reanalysis | L     | 5648 | -50.8 | 22    | 13.7 | IFG (pars Triangularis)     | -52 | 34   | 10   | IFG (pars Triangularis)     | 41, 43, 44, 46, 47, 50, 51, 52, 53         |        |    |      |       |       |      |     |    |      |       |     |      |                       |    |    |    |    |    |
|            |       |      |       |       |      |                             | -54 | 24   | 14   | IFG (pars Triangularis)     |                                            |        |    |      |       |       |      |     |    |      |       |     |      |                       |    |    |    |    |    |
|            |       |      |       |       |      |                             | -58 | 12   | 14   | IFG (pars Opercularis)      |                                            |        |    |      |       |       |      |     |    |      |       |     |      |                       |    |    |    |    |    |
|            |       |      |       |       |      |                             | -38 | 6    | 34   | Precentral Gyrus/PMC*       |                                            |        |    |      |       |       |      |     |    |      |       |     |      |                       |    |    |    |    |    |
|            |       |      |       |       |      |                             | -42 | 22   | 16   | IFG (pars Triangularis)     |                                            |        |    |      |       |       |      |     |    |      |       |     |      |                       |    |    |    |    |    |
|            |       |      |       |       |      |                             | -42 | 2    | 26   | Precentral Gyrus/PMC*       |                                            |        |    |      |       |       |      |     |    |      |       |     |      |                       |    |    |    |    |    |
|            |       |      |       |       |      |                             | -44 | 0    | 46   | Precentral Gyrus/PMC*       |                                            |        |    |      |       |       |      |     |    |      |       |     |      |                       |    |    |    |    |    |
|            |       |      |       |       |      |                             | -4  | 16   | 48   | Post.-Med. Frontal/pre-SMA* |                                            |        |    |      |       |       |      |     |    |      |       |     |      |                       |    |    |    |    |    |
|            |       |      |       |       |      |                             | -48 | 16   | 12   | IFG (pars Opercularis)      |                                            |        |    |      |       |       |      |     |    |      |       |     |      |                       |    |    |    |    |    |
|            |       |      |       |       |      |                             | -52 | 18   | 26   | IFG (pars Triangularis)     |                                            |        |    |      |       |       |      |     |    |      |       |     |      |                       |    |    |    |    |    |
|            |       |      |       |       |      |                             | -56 | 14   | 38   | Precentral Gyrus/PMC*       |                                            |        |    |      |       |       |      |     |    |      |       |     |      |                       |    |    |    |    |    |
|            |       |      |       |       |      |                             | -56 | -44  | 2    | MTG                         |                                            |        |    |      |       |       |      |     |    |      |       |     |      |                       |    |    |    |    |    |
| Reanalysis | L     | 3152 | -53.2 | -43.9 | 3.2  | MTG                         | -52 | -46  | 2    | MTG                         | 56, 57, 61, 62, 66, 69, 72, 74             |        |    |      |       |       |      |     |    |      |       |     |      |                       |    |    |    |    |    |
|            |       |      |       |       |      |                             | -2  | 14   | 52   | Post.-Med. Frontal/pre-SMA* |                                            |        |    |      |       |       |      |     |    |      |       |     |      |                       |    |    |    |    |    |
|            |       |      |       |       |      |                             | 34  | 24   | -2   | Insula                      |                                            |        |    |      |       |       |      |     |    |      |       |     |      |                       |    |    |    |    |    |
|            |       |      |       |       |      |                             | -34 | -56  | 46   | IPL                         |                                            |        |    |      |       |       |      |     |    |      |       |     |      |                       |    |    |    |    |    |
|            |       |      |       |       |      |                             | -40 | 2    | 46   | Precentral Gyrus/PMC*       |                                            |        |    |      |       |       |      |     |    |      |       |     |      |                       |    |    |    |    |    |
|            |       |      |       |       |      |                             | -56 | 12   | 14   | IFG (pars Opercularis)      |                                            |        |    |      |       |       |      |     |    |      |       |     |      |                       |    |    |    |    |    |
| Reanalysis | L     | 2480 | -2.6  | 12.8  | 54.9 | Post.-Med. Frontal/pre-SMA* | 60  | 62   | 64   | 65                          | 67                                         | 69     | 71 | 72   |       |       |      |     |    |      |       |     |      |                       |    |    |    |    |    |
|            |       |      |       |       |      |                             | R   | 1704 | 32.7 | 24.4                        | -2.7                                       | Insula | 55 | 58   | 62    | 65    | 69   | 72  |    |      |       |     |      |                       |    |    |    |    |    |
|            |       |      |       |       |      |                             |     |      |      |                             |                                            |        | L  | 1360 | -31.8 | -55.5 | 44.1 | IPL | 55 | 58   | 62    | 64  | 68   | 69                    |    |    |    |    |    |
|            |       |      |       |       |      |                             |     |      |      |                             |                                            |        |    |      |       |       |      |     | L  | 1184 | -39.5 | 3.2 | 45.2 | Precentral Gyrus/PMC* | 61 | 67 | 68 | 69 | 71 |

|         |   |      |       |      |      |                         |     |    |    |                         |
|---------|---|------|-------|------|------|-------------------------|-----|----|----|-------------------------|
| Overlap | L | 1176 | -50.1 | 17.1 | 19.9 | IFG (pars Opercularis)  | -54 | 20 | 14 | IFG (pars Triangularis) |
|         |   |      |       |      |      |                         | -50 | 18 | 22 | IFG (pars Triangularis) |
|         | L | 24   | -53.4 | 20.1 | 2.7  | IFG (pars Triangularis) | -54 | 20 | 2  | IFG (pars Triangularis) |

**Table 5: Syntax clusters found by ALE analysis of merge, movement, and reanalysis.** WC: the weighted center of the cluster; EV: the extrema value; IFG: inferior frontal gyrus; MTG: middle temporal gyrus; STG: superior temporal gyrus; PMC: premotor cortex; Post.-Med. Frontal: posterior-medial frontal; SMA: supplementary motor area; IPL; intraparietal lobule. Asterisk indicates that the second anatomical label was assigned manually by the authors.



| Hemi. | Vol. | WC    |      |      | WC Label<br>(Anatomy)       | EV  |    |    | EV Label<br>(Anatomy)       |
|-------|------|-------|------|------|-----------------------------|-----|----|----|-----------------------------|
|       |      | x     | y    | z    |                             | x   | y  | z  |                             |
| L     | 1552 | -49.6 | 11.1 | 19.1 | IFG (pars Opercularis)      | -50 | 12 | 18 | IFG (pars Opercularis)      |
|       |      |       |      |      |                             | -42 | 8  | 26 | IFG (pars Opercularis)      |
| L     | 1312 | -0.9  | 18.3 | 50.6 | Post.-Med. Frontal/pre-SMA* | 2   | 16 | 52 | Post.-Med. Frontal/pre-SMA* |
|       |      |       |      |      |                             | -6  | 24 | 42 | Sup.-Med. Gyrus/pre-SMA*    |
|       |      |       |      |      |                             | -2  | 14 | 60 | Post.-Med. Frontal/pre-SMA* |
| L     | 1008 | -31.1 | 26.5 | -2.8 | Insula                      | -32 | 24 | 0  | Insula                      |
| R     | 72   | 33.1  | 22.7 | 0.9  | Insula                      | 32  | 24 | 2  | Insula                      |
| L     | 48   | -4    | 6.3  | 54.3 | Post.-Med. Frontal/pre-SMA* | -4  | 6  | 54 | Post.-Med. Frontal/pre-SMA* |
| L     | 8    | 0     | 8    | 52   | Post.-Med. Frontal/pre-SMA* | 0   | 8  | 52 | Post.-Med. Frontal/pre-SMA* |

**Table 6: Overlapping clusters between rhythm and all syntax.** WC: the weighted center of the cluster; EV: the extrema value; IFG: inferior frontal gyrus; Post.-Med. Frontal: posterior-medial frontal; Sup.-Med. Gyrus: superior medial gyrus; SMA: supplementary motor area. Asterisk indicates that the second anatomical label was assigned manually by the authors.

|                     | Hemi. | Vol. | WC    |      |      | WC Label<br>(Anatomy)       | EV  |     |    | EV Label<br>(Anatomy)       |
|---------------------|-------|------|-------|------|------|-----------------------------|-----|-----|----|-----------------------------|
|                     |       |      | x     | y    | z    |                             | x   | y   | z  |                             |
| Rhythm & Merge      | L     | 1112 | -50.9 | 11.8 | 17   | IFG (pars Opercularis)      | -50 | 12  | 18 | IFG (pars Opercularis)      |
|                     | L     | 688  | -49.5 | 13.2 | 20.1 | IFG (pars Opercularis)      | -50 | 16  | 22 | IFG (pars Opercularis)      |
| Rhythm & Movement   | L     | 160  | -0.7  | 21.4 | 44.1 | Post.-Med. Frontal/pre-SMA* | 0   | 20  | 44 | Post.-Med. Frontal/pre-SMA* |
|                     | L     | 64   | -1.3  | 16.5 | 49.7 | Post.-Med. Frontal/pre-SMA* | -2  | 16  | 50 | Post.-Med. Frontal/pre-SMA* |
|                     | L     | 784  | 0.2   | 16.2 | 53.2 | Post.-Med. Frontal/pre-SMA* | 2   | 16  | 52 | Post.-Med. Frontal/pre-SMA* |
|                     | L     | 664  | -50.2 | 13.3 | 16.9 | IFG (pars Opercularis)      | -50 | 14  | 16 | IFG (pars Opercularis)      |
| Rhythm & Reanalysis | R     | 136  | 32.7  | 22.6 | 1.7  | Insula                      | 32  | 22  | 2  | None/Insula*                |
|                     | L     | 48   | -37.3 | -53  | 41.7 | IPL                         | -36 | -52 | 42 | IPL                         |
|                     | L     | 24   | -3.3  | 4    | 63.4 | Post.-Med. Frontal/pre-SMA* | -4  | 4   | 64 | Post.-Med. Frontal/pre-SMA* |
|                     | L     | 8    | 0     | 8    | 52   | Post.-Med. Frontal/pre-SMA* | 0   | 8   | 52 | Post.-Med. Frontal/pre-SMA* |
|                     | L     | 8    | -4    | 8    | 54   | Post.-Med. Frontal/pre-SMA* | -4  | 8   | 54 | Post.-Med. Frontal/pre-SMA* |
|                     | L     | 8    | -4    | 6    | 56   | Post.-Med. Frontal/pre-SMA* | -4  | 6   | 56 | Post.-Med. Frontal/pre-SMA* |

**Table 7: Overlapping clusters between rhythm and each syntax analysis.** WC: the weighted center of the cluster; EV: the extrema value; IFG: inferior frontal gyrus; Post.-Med. Frontal: posterior-medial frontal; SMA: supplementary motor area; IPL: intraparietal lobule. Asterisk indicates that the second anatomical label was assigned manually by the authors.
